# Supplementary material for: A refined model of how Yersinia pestis produces a transmissible infection in its flea vector
Source: PubMed Central journal article supplement (PMC7185726; doi:10.1371/journal.ppat.1008440), 2020-04-15

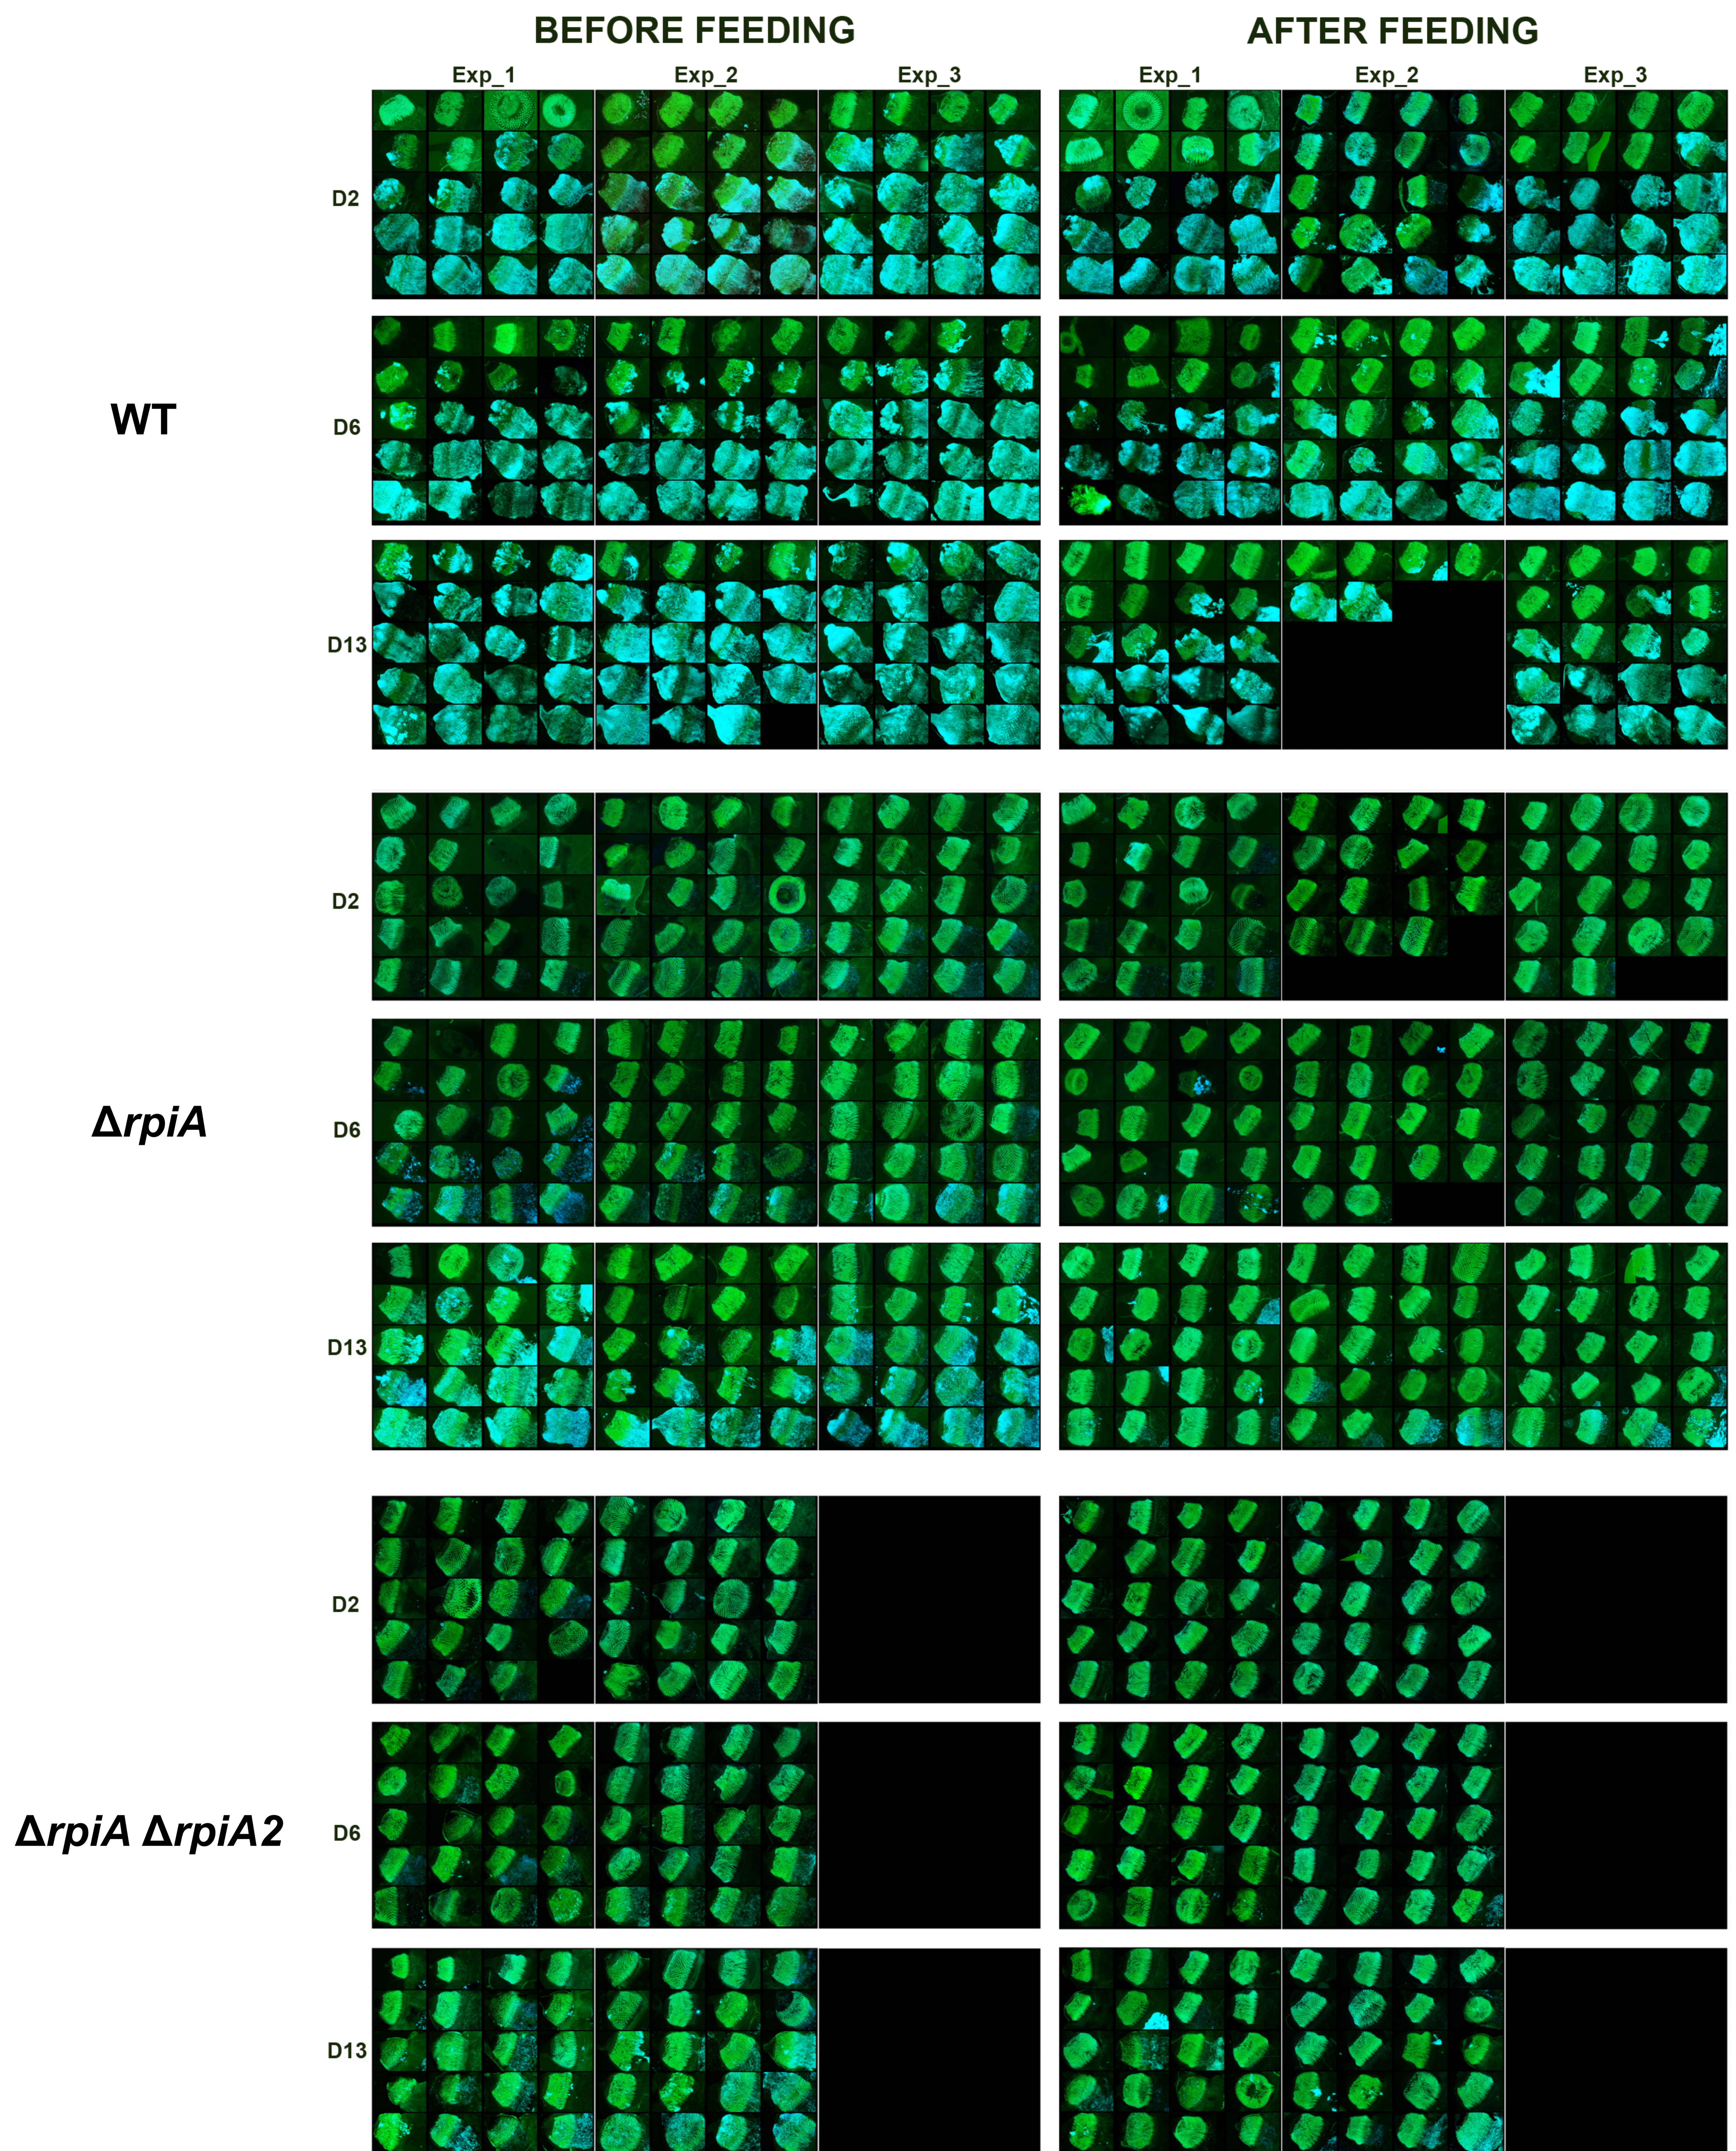

**Figure S7. *rpiA* and *rpiA2* are needed to maintain *Y. pestis* in the proventriculus after feeding.** Fluorescence images of the proventriculus (in green) infected with the WT,  $\Delta rpiA$  or  $\Delta rpiA \Delta rpiA2$  strains (in blue) before and immediately after feeding, acquired 2, 6 and 13 days post-infection.



**BEFORE FEEDING**

**AFTER FEEDING**

Exp\_4

Exp\_5

Exp\_4

Exp\_5

D2

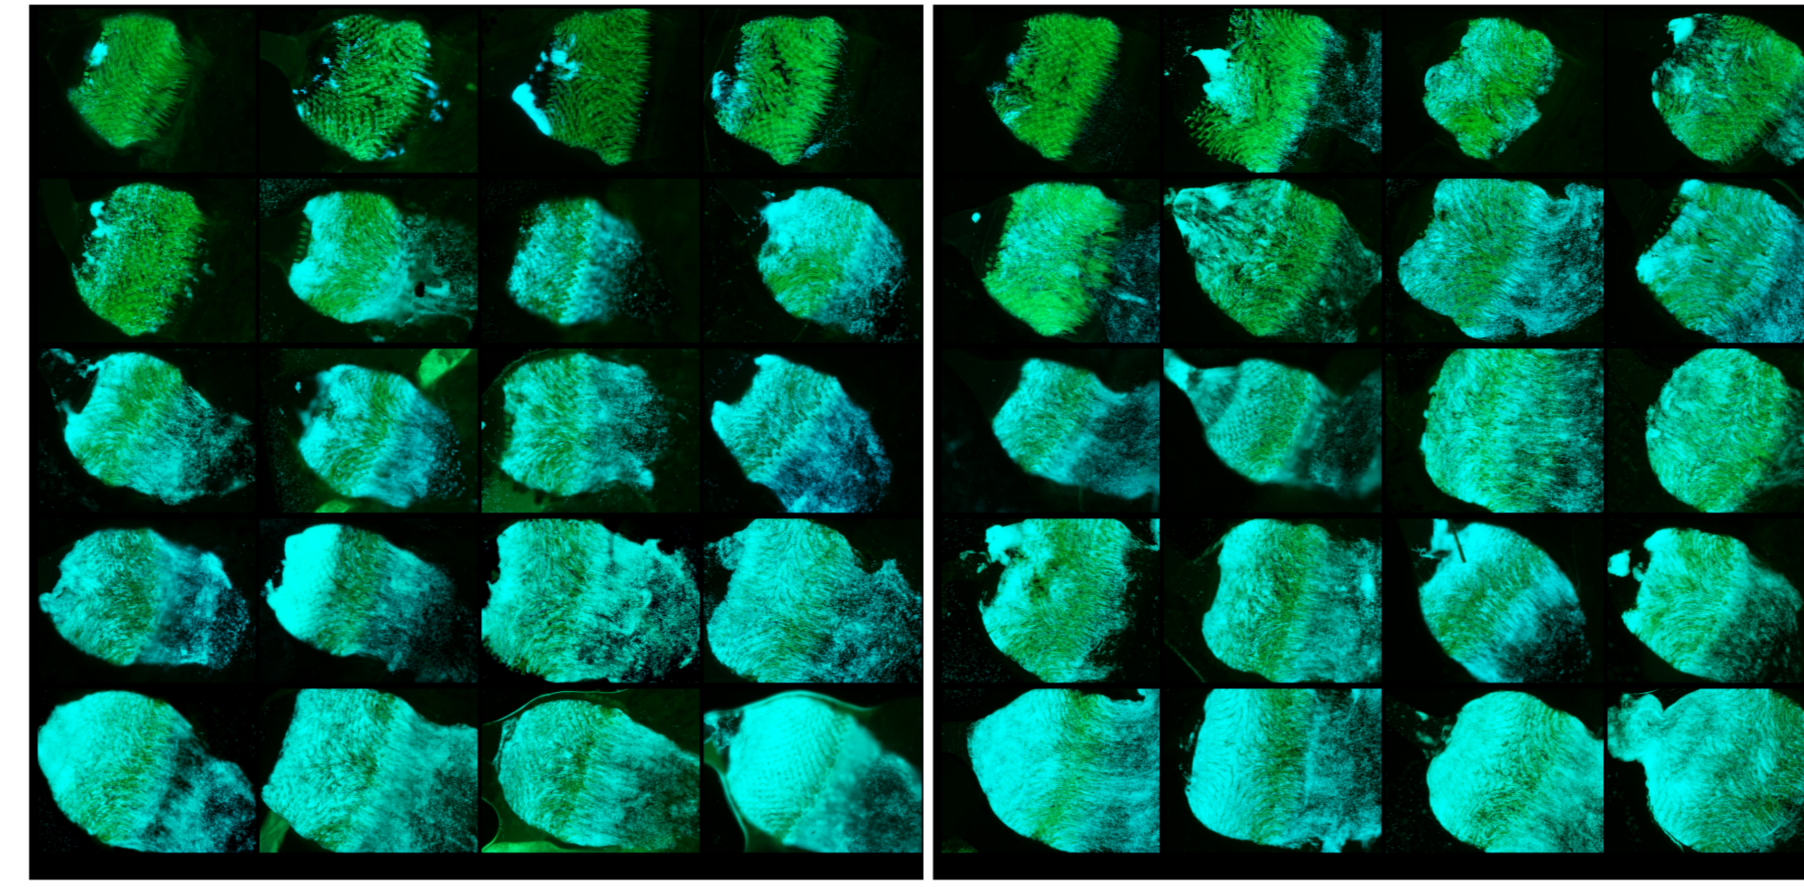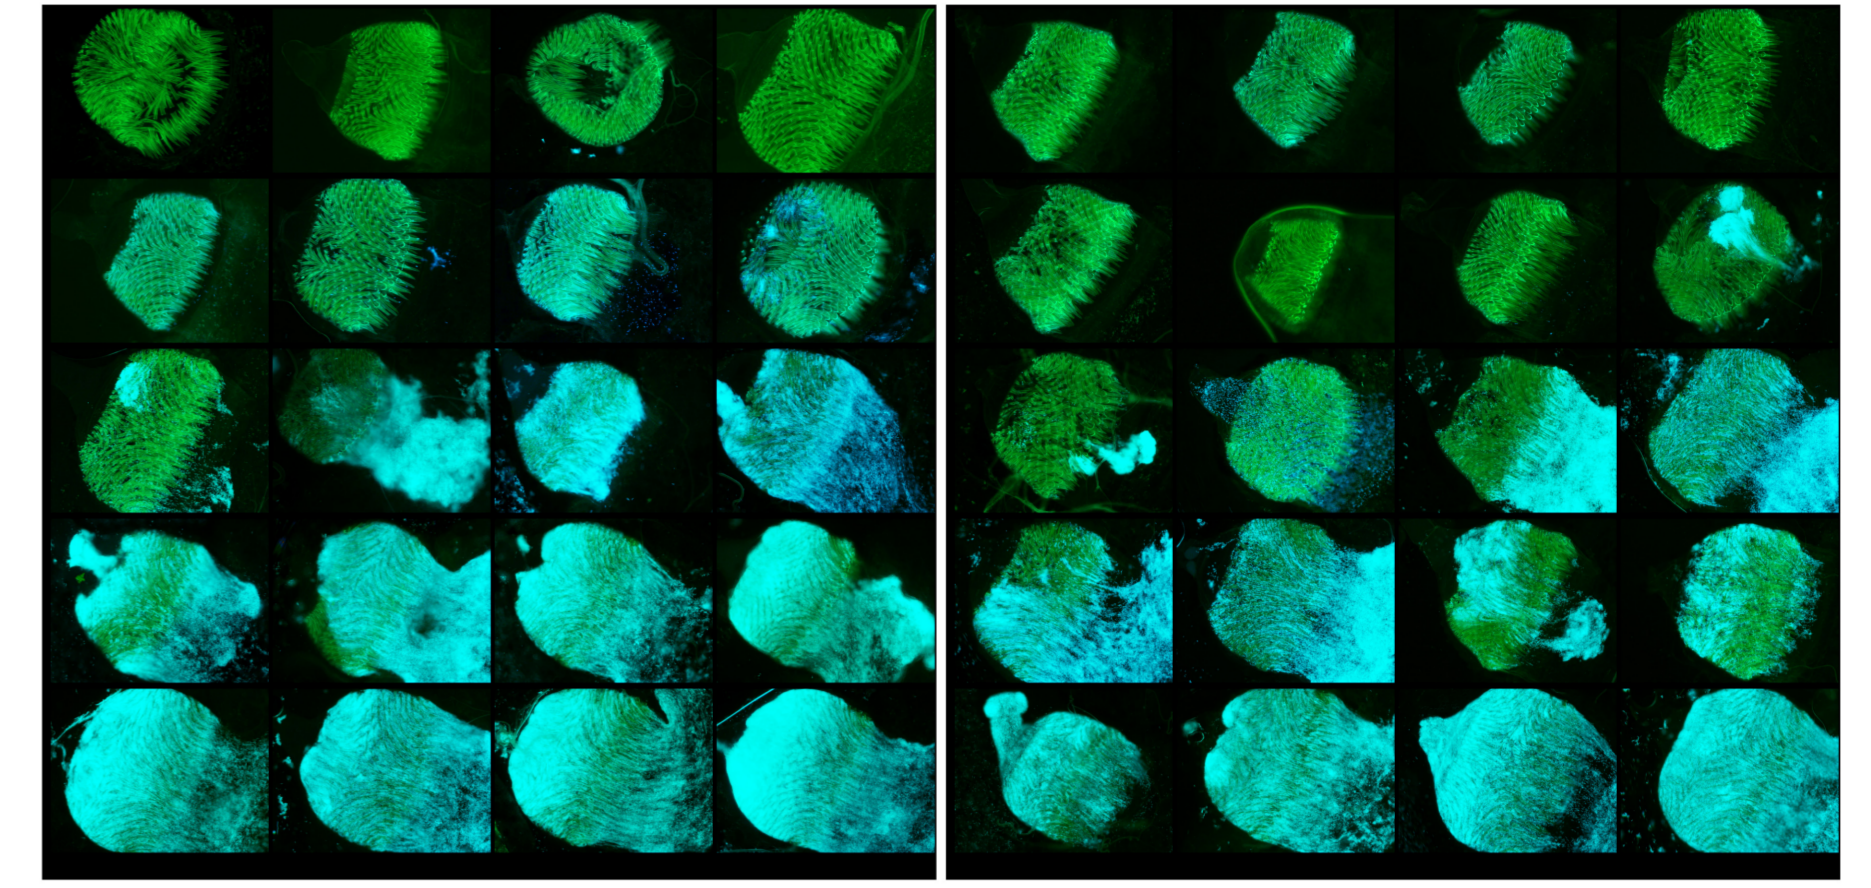

**WT**

D6

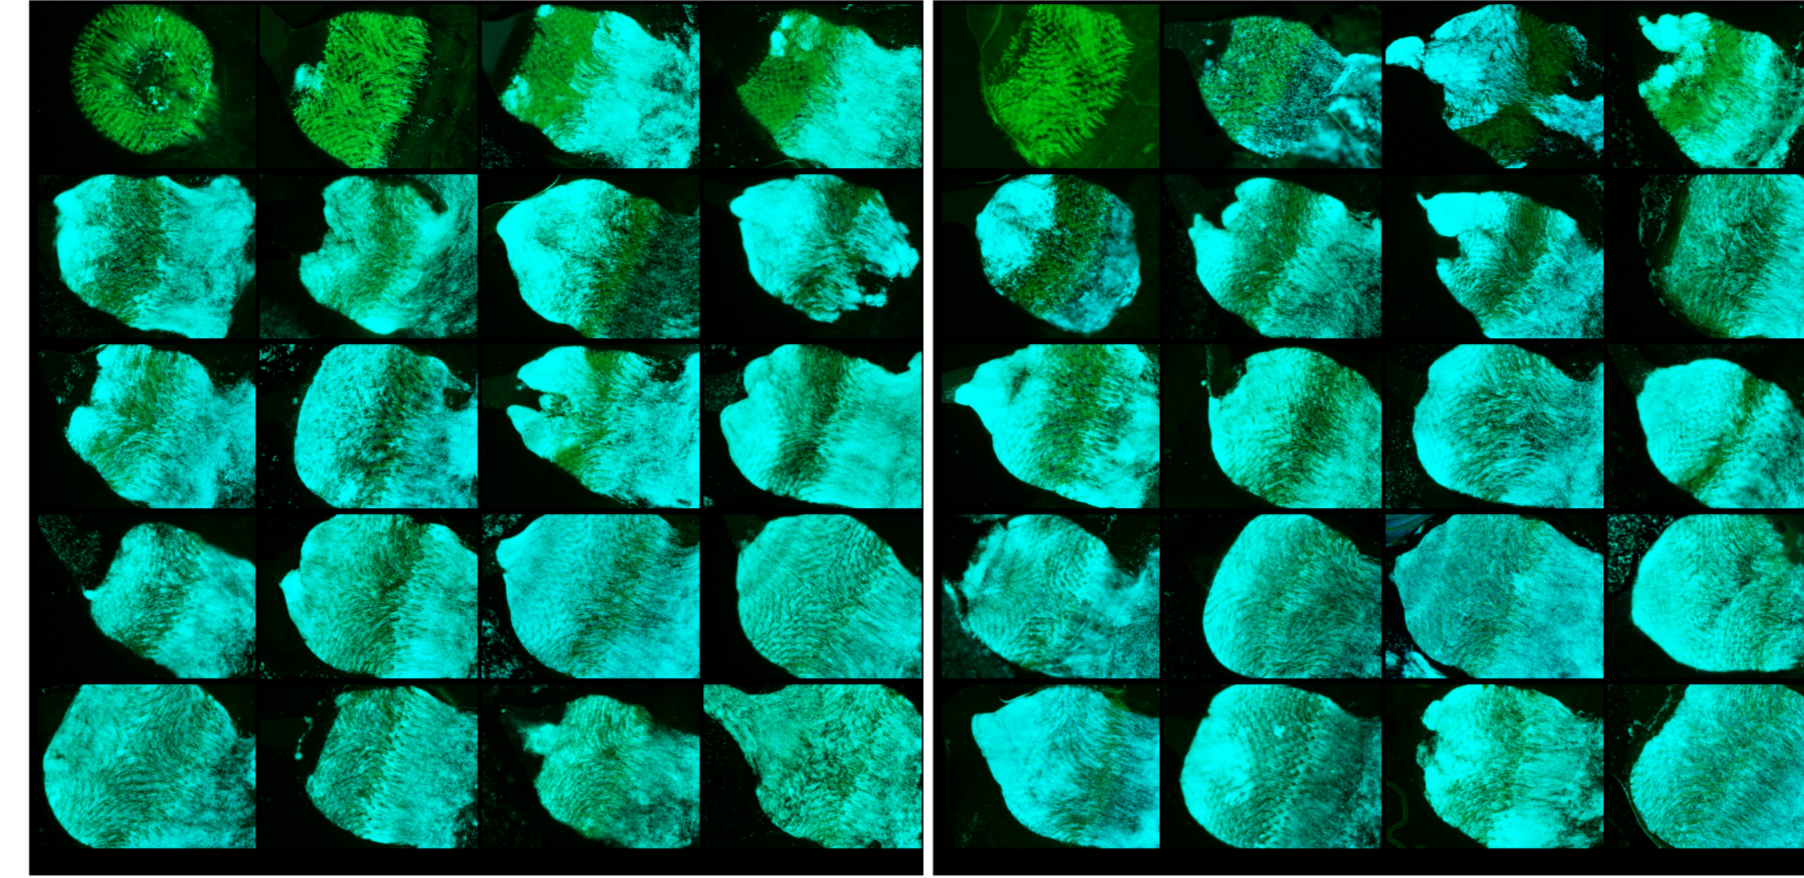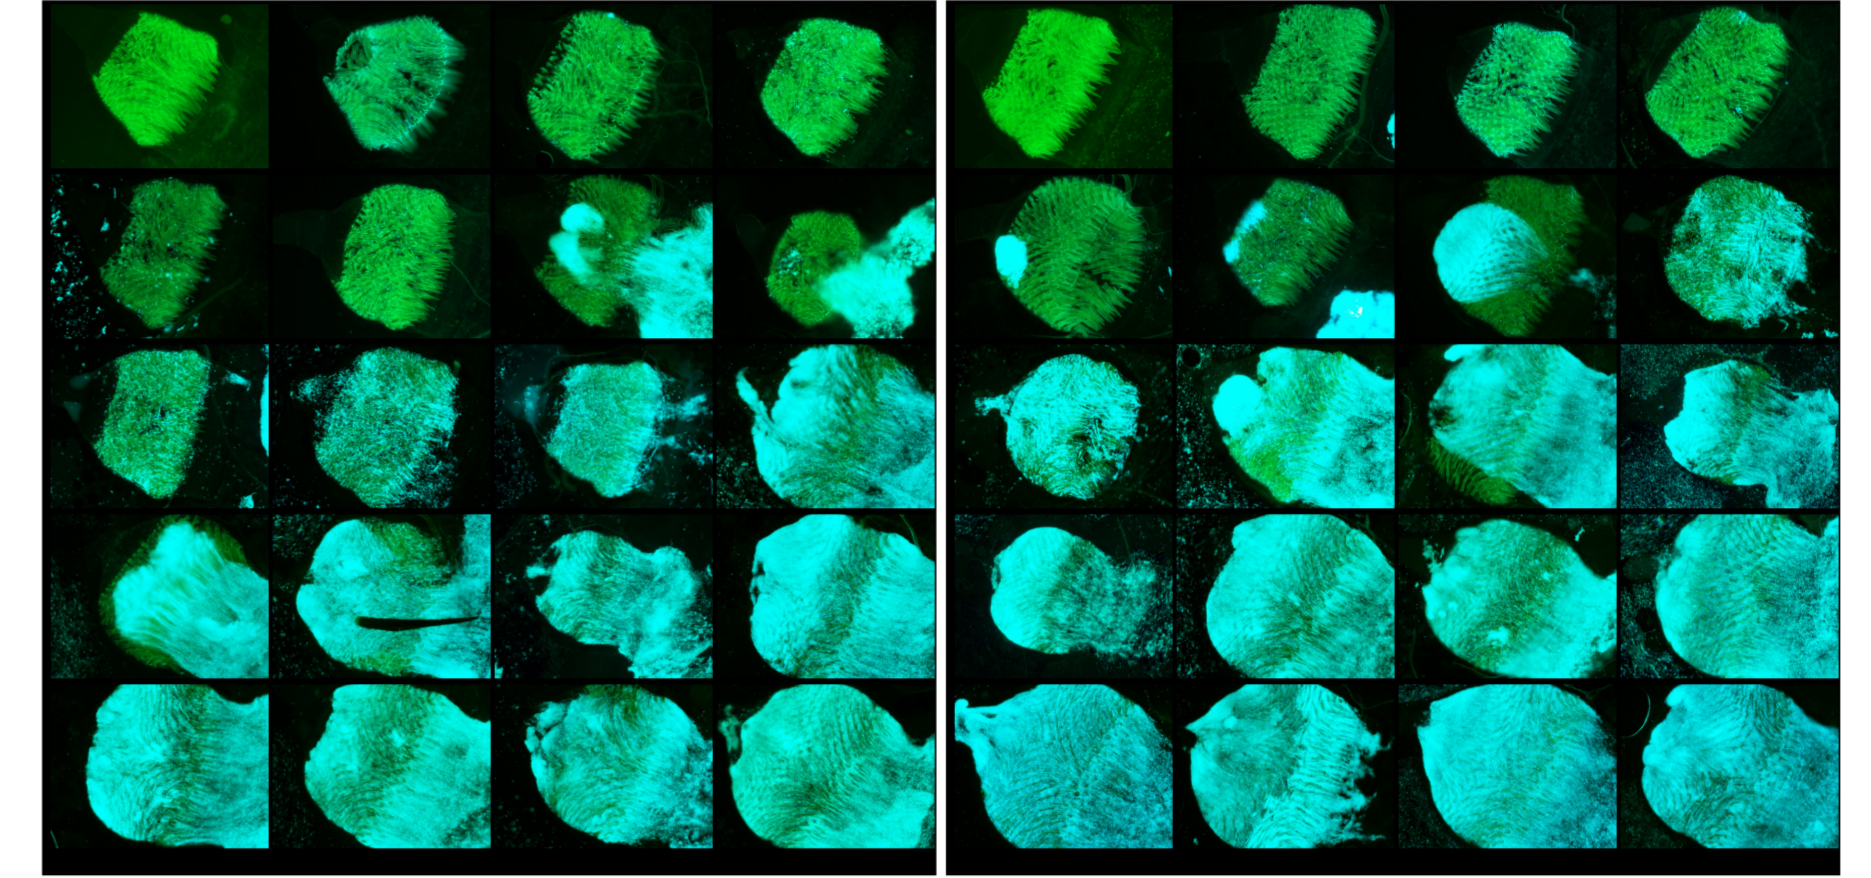

D13

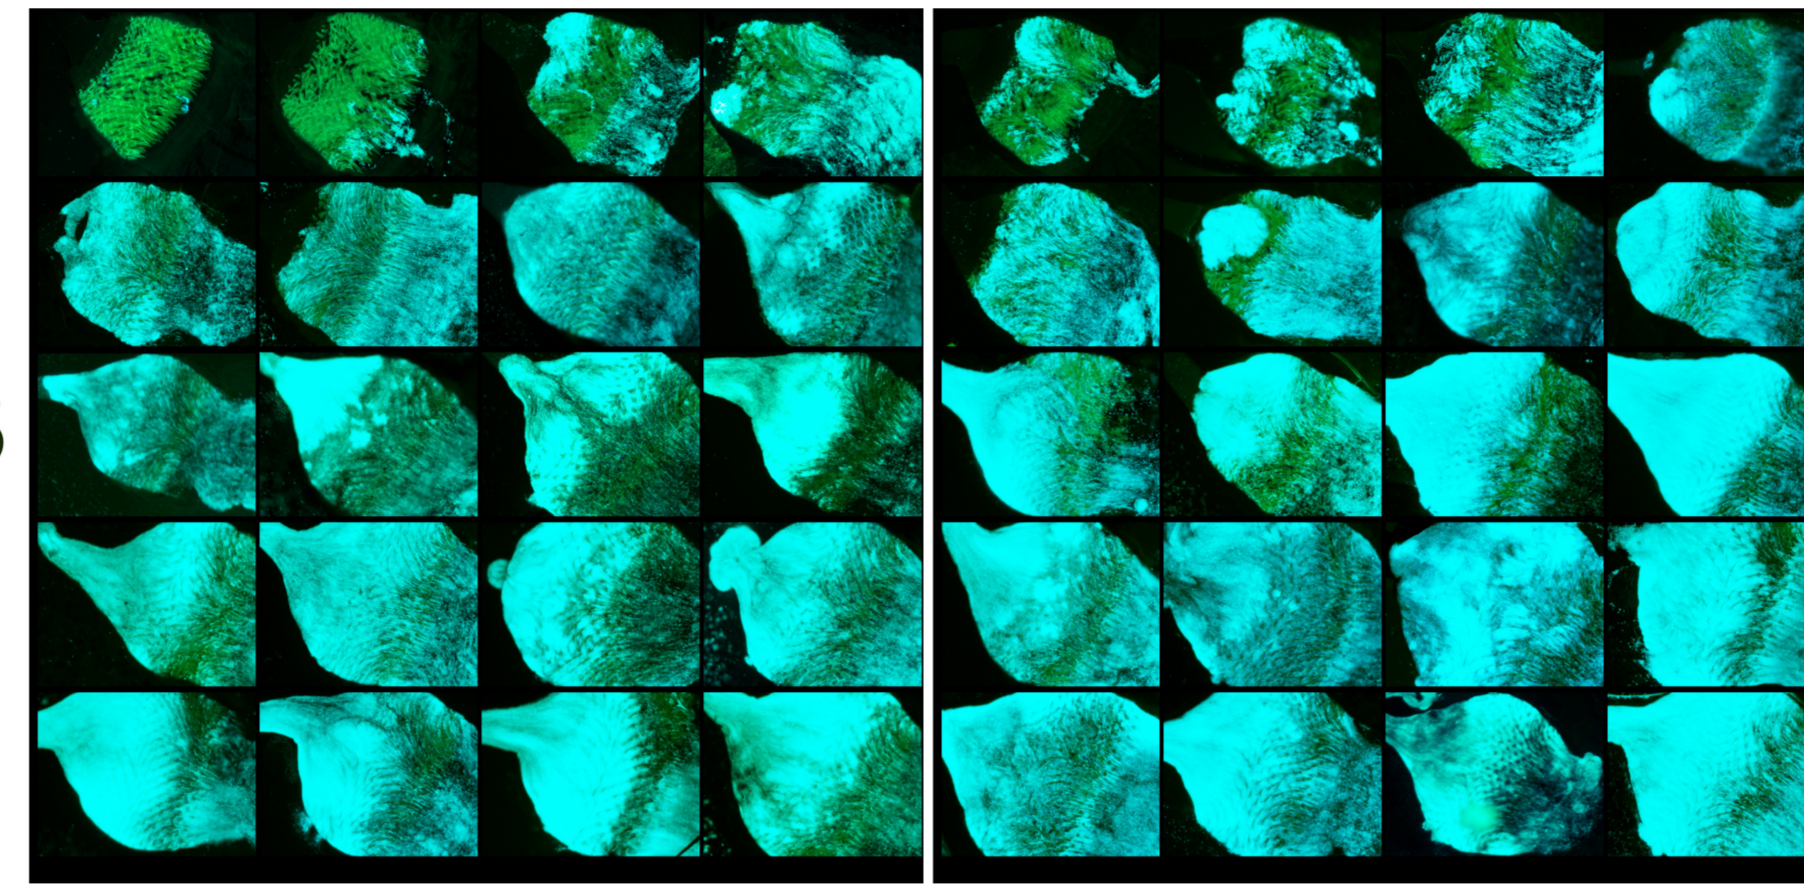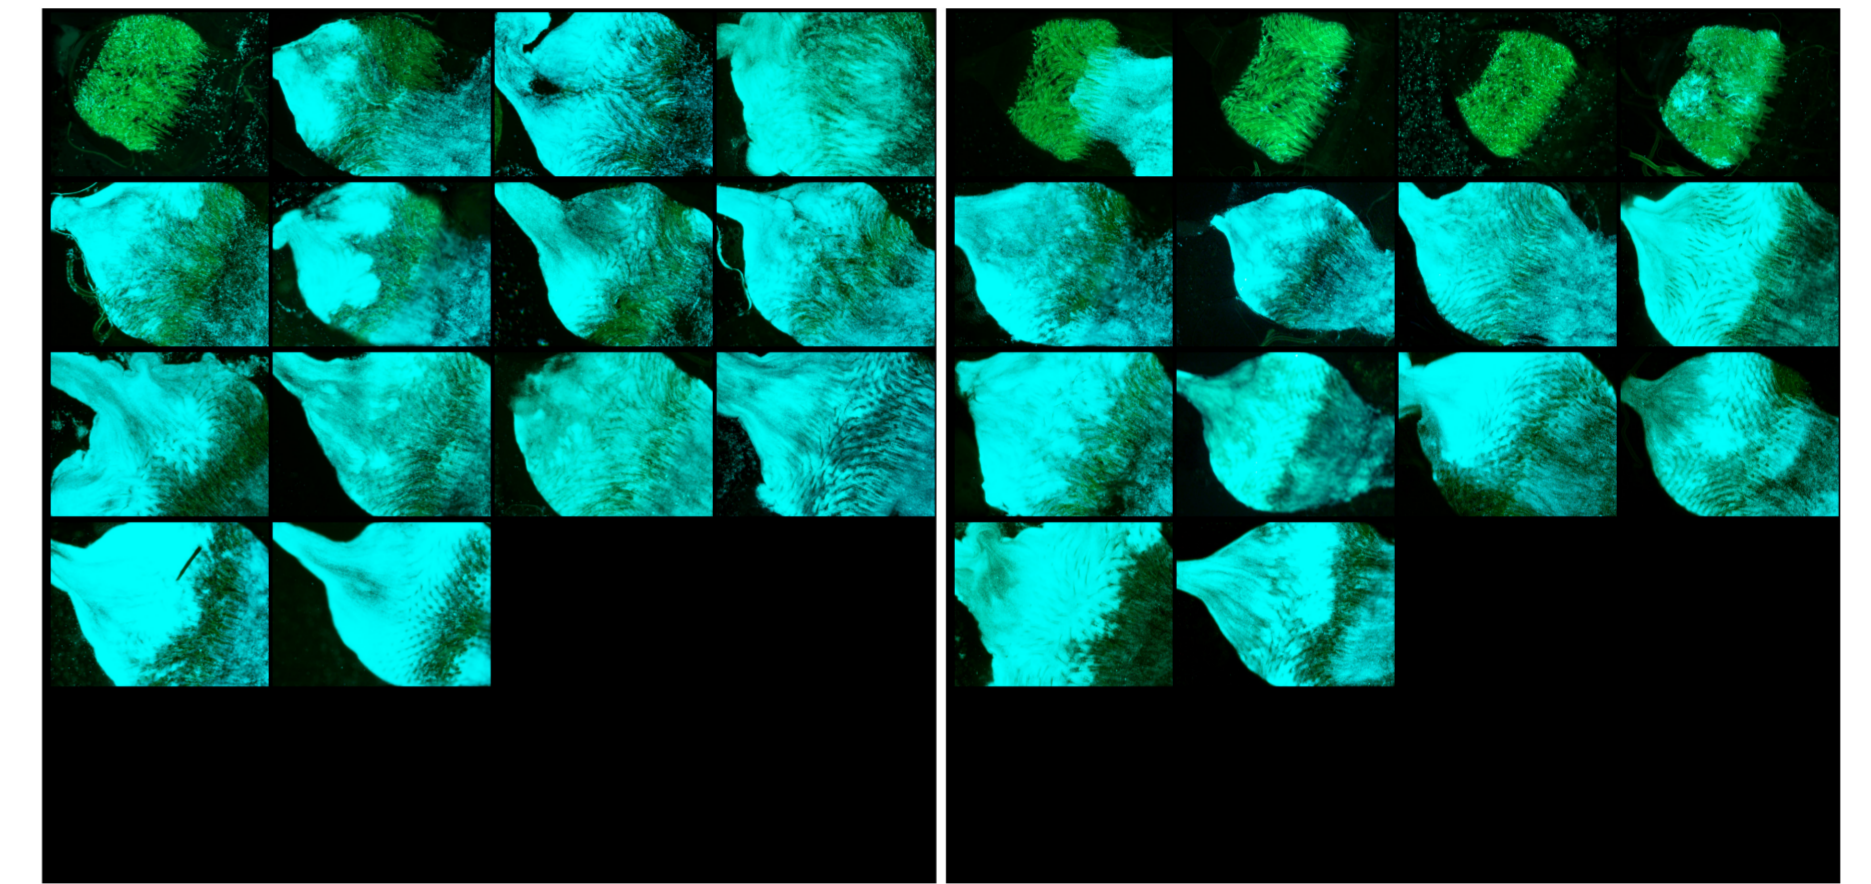

D2

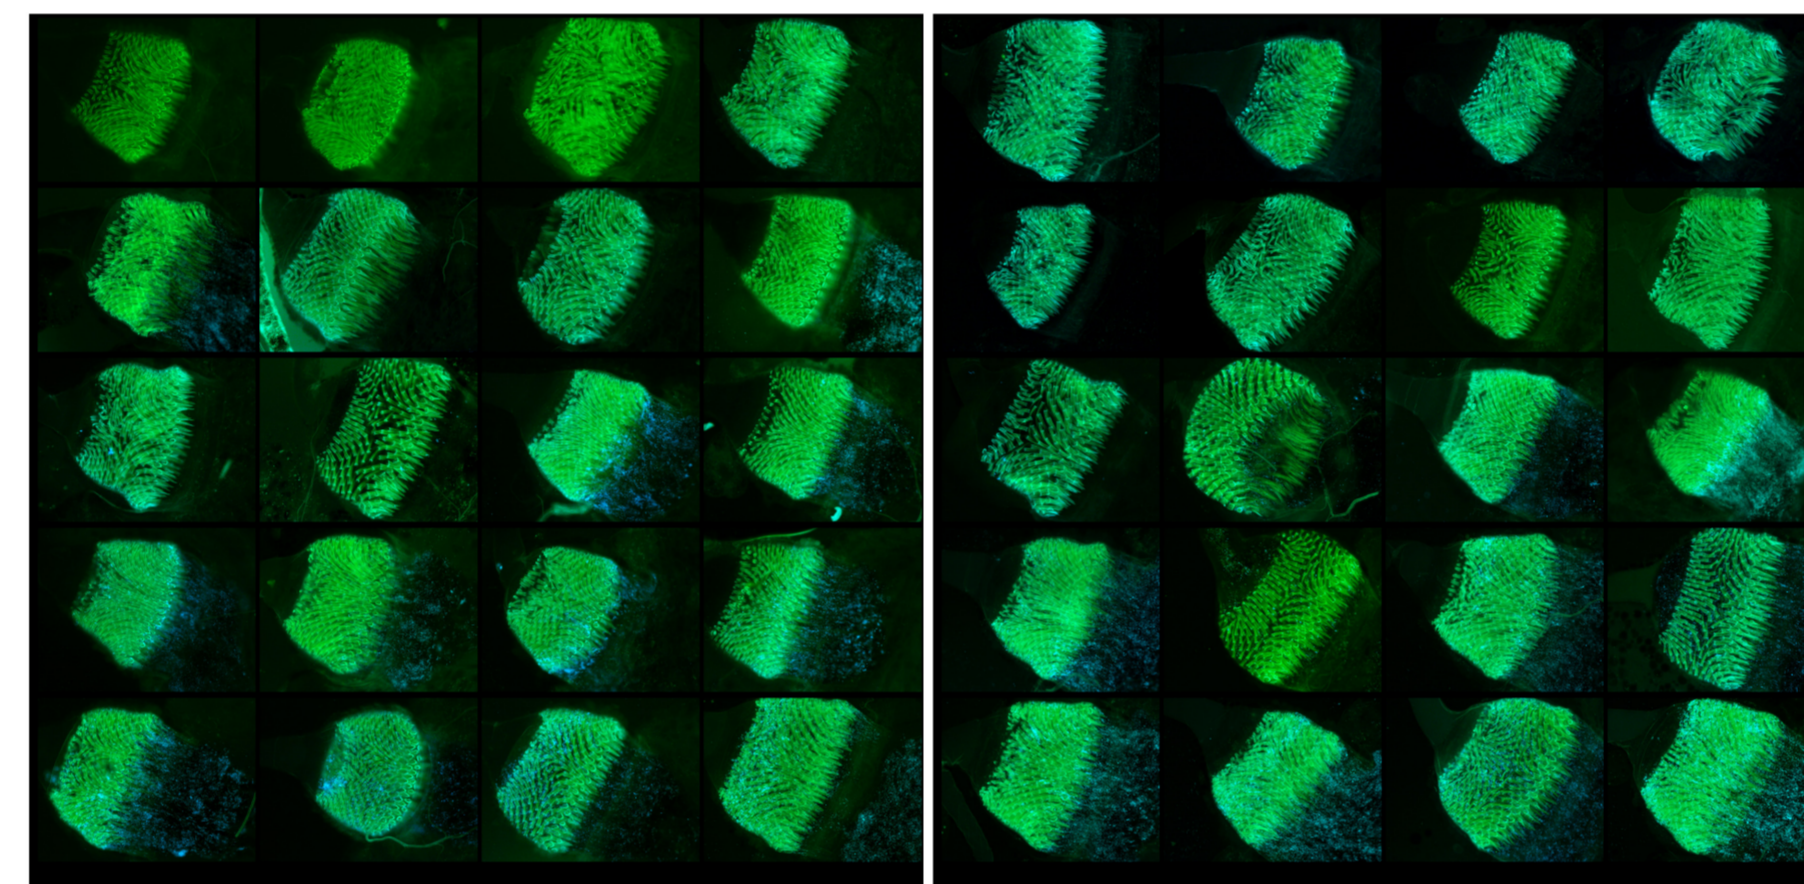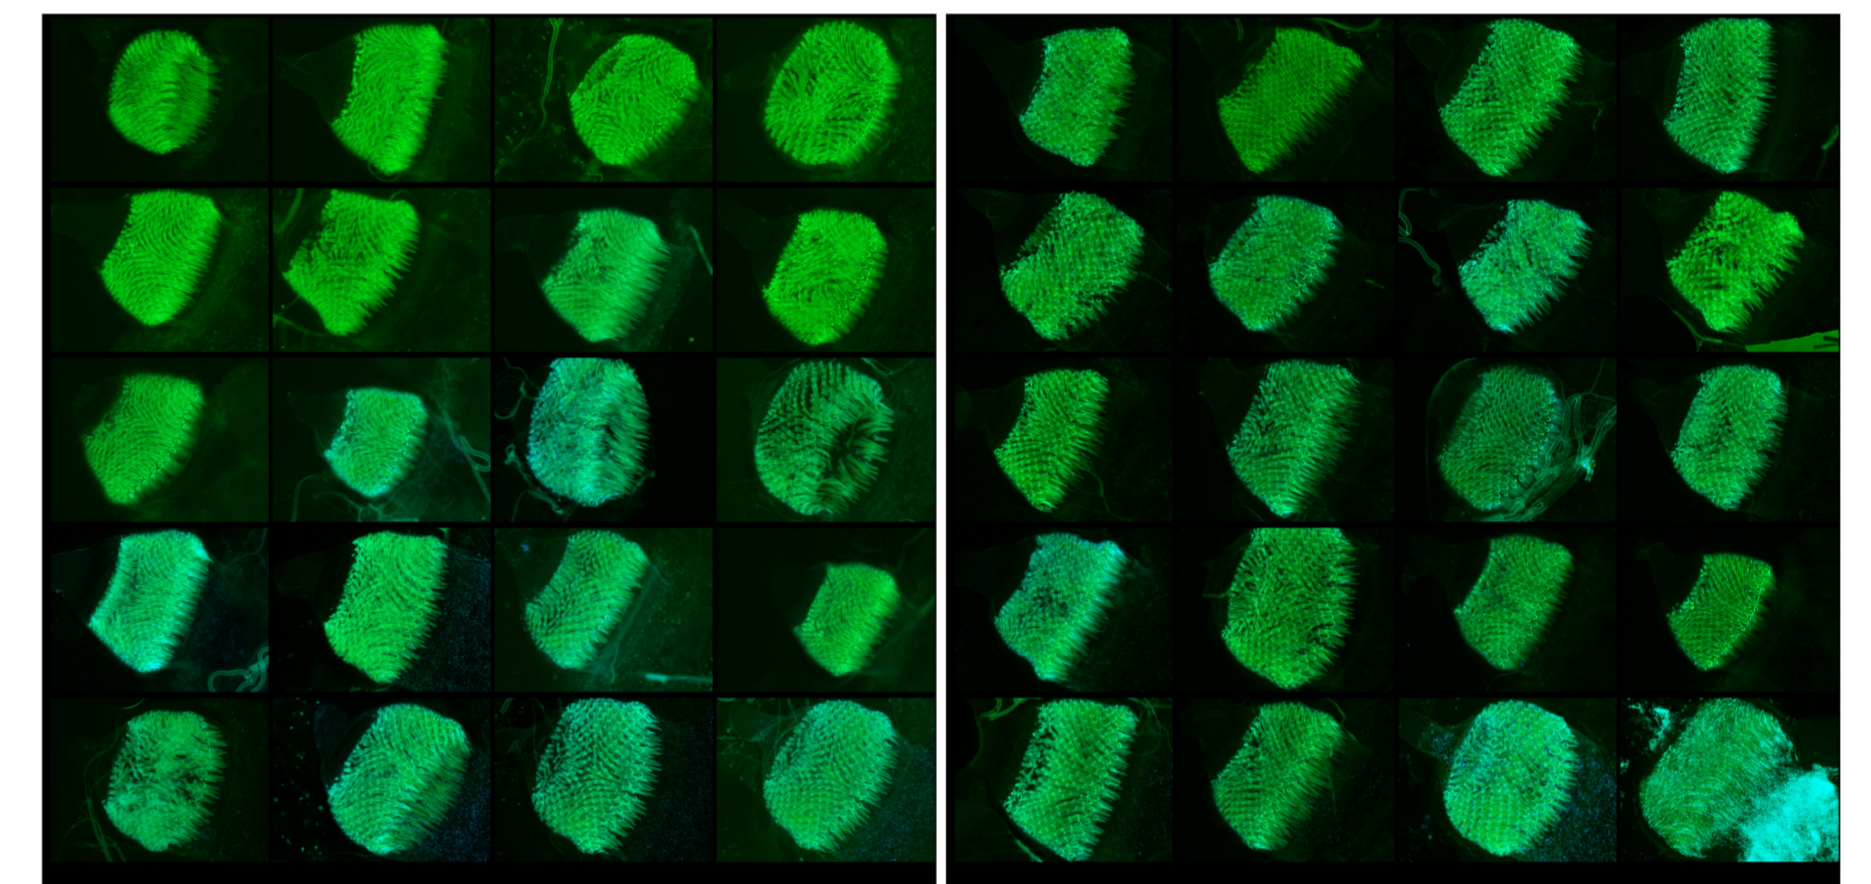

**ΔrpiA**

D6

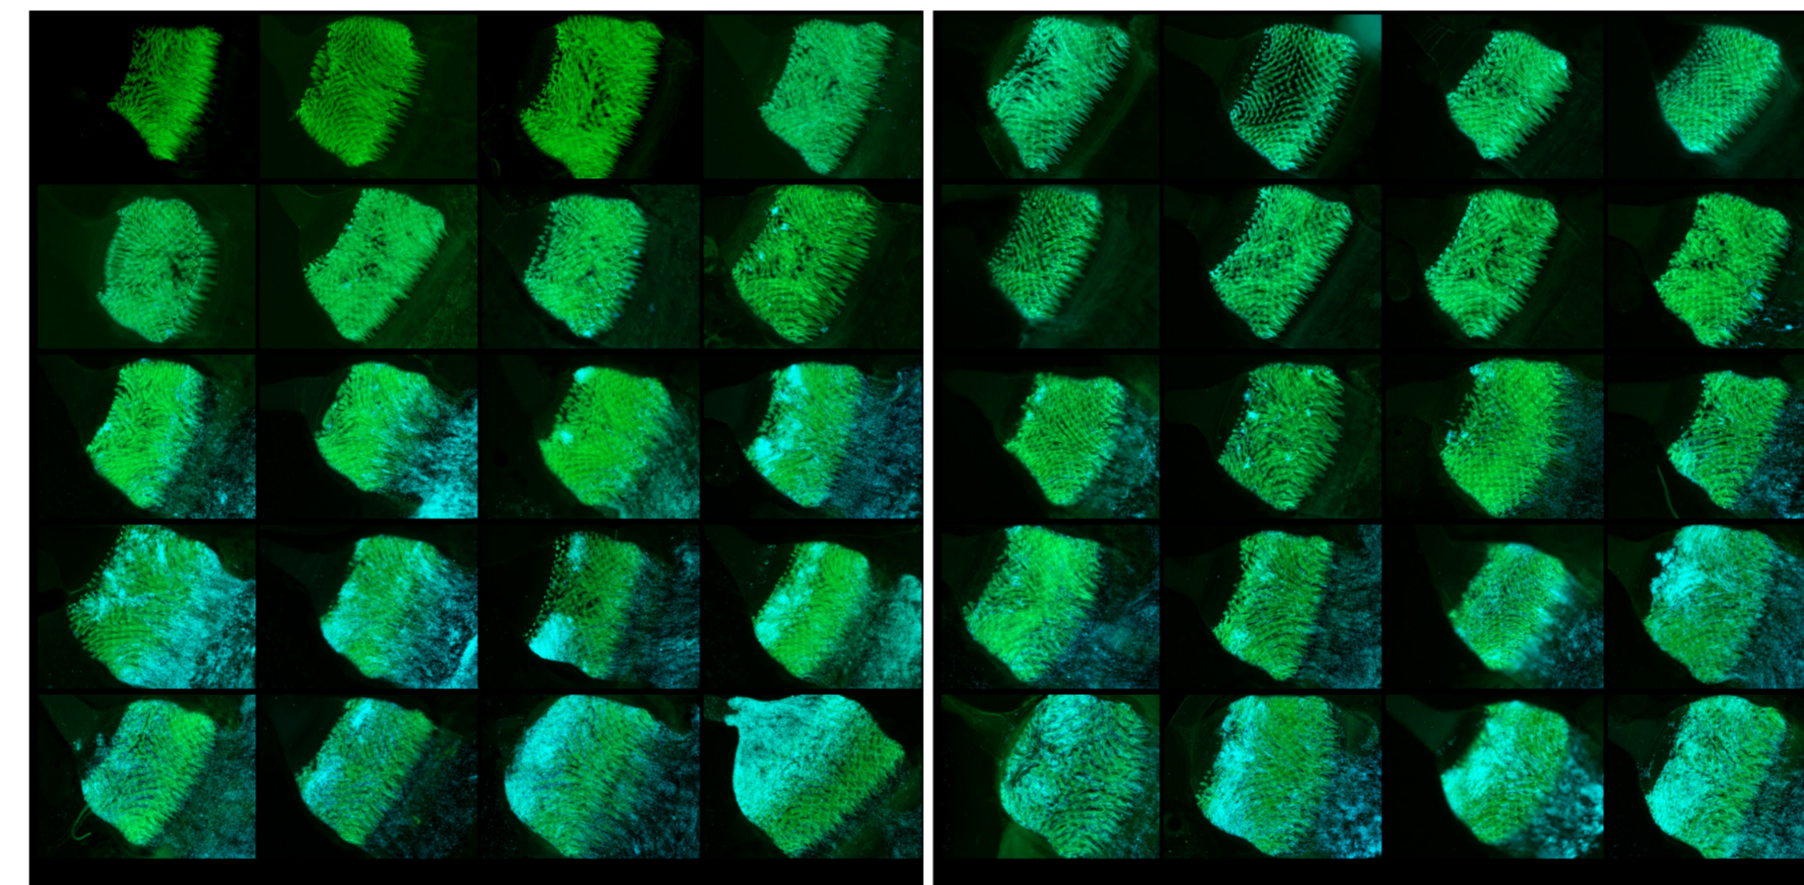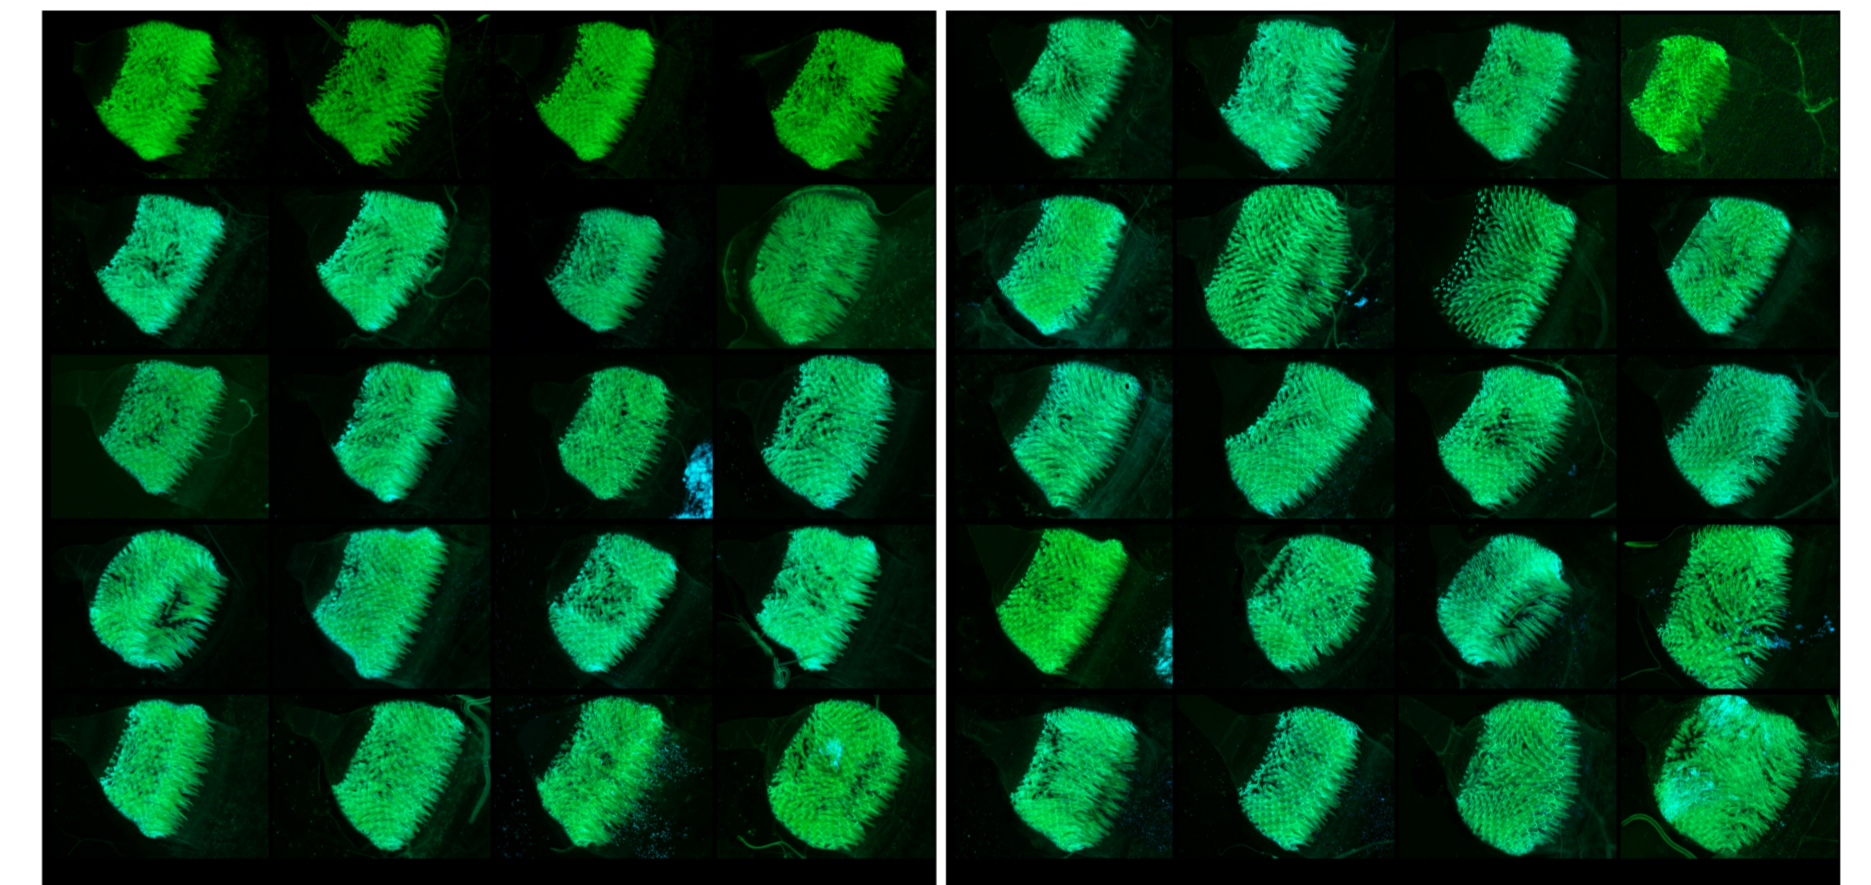

D13

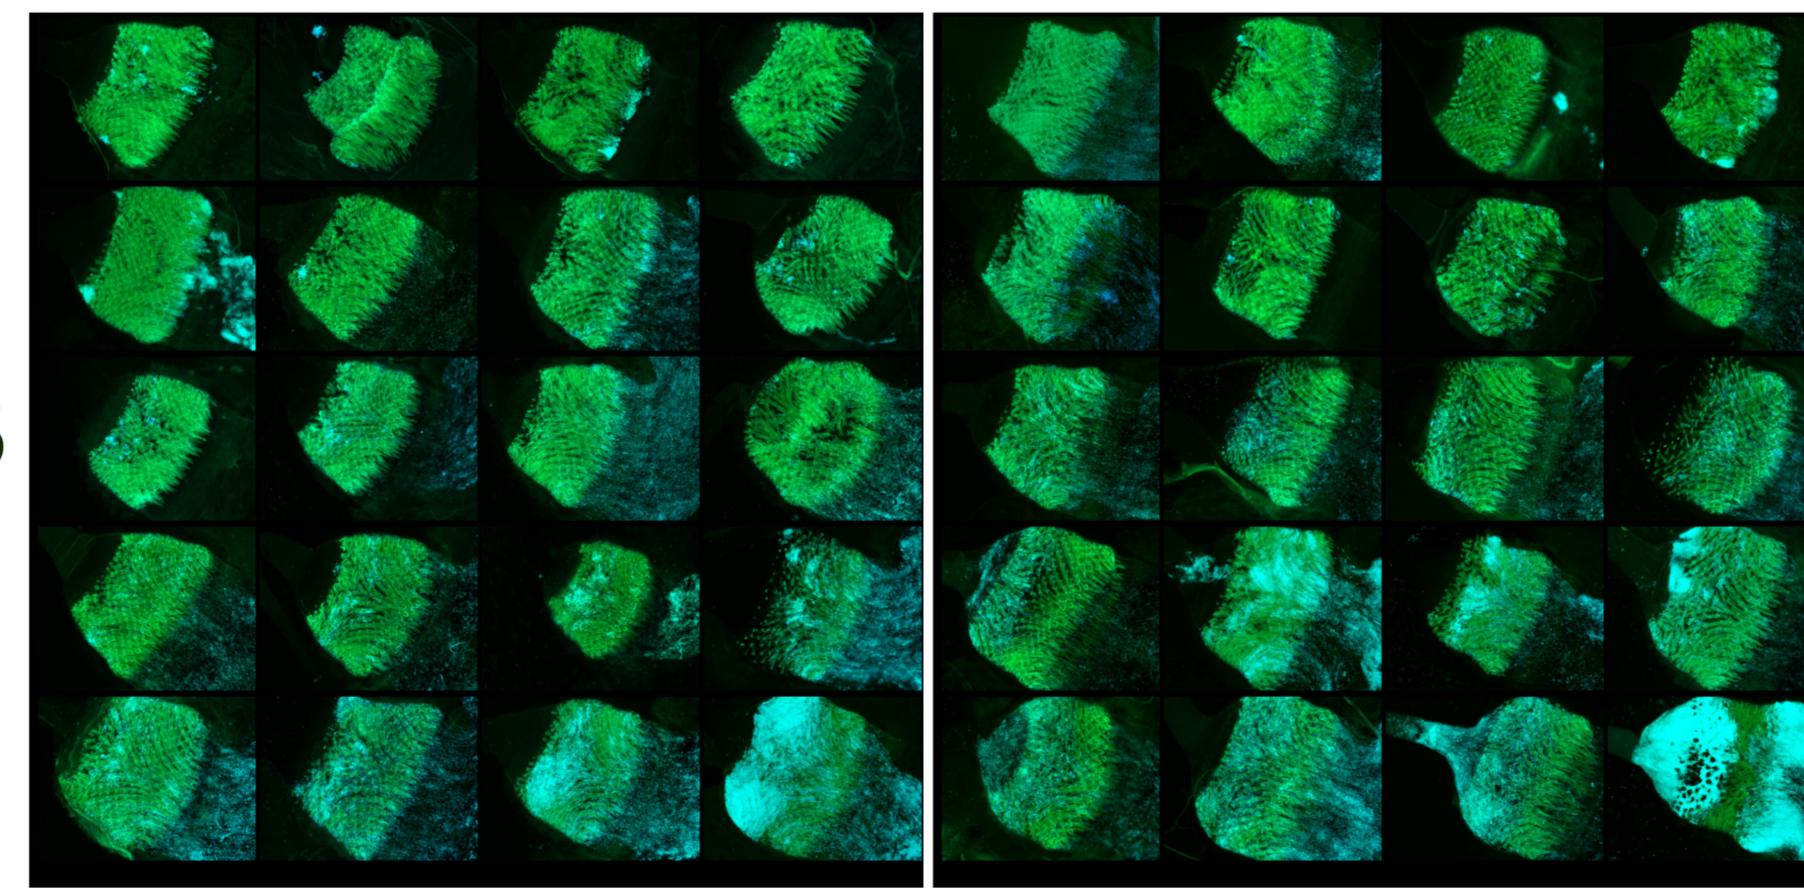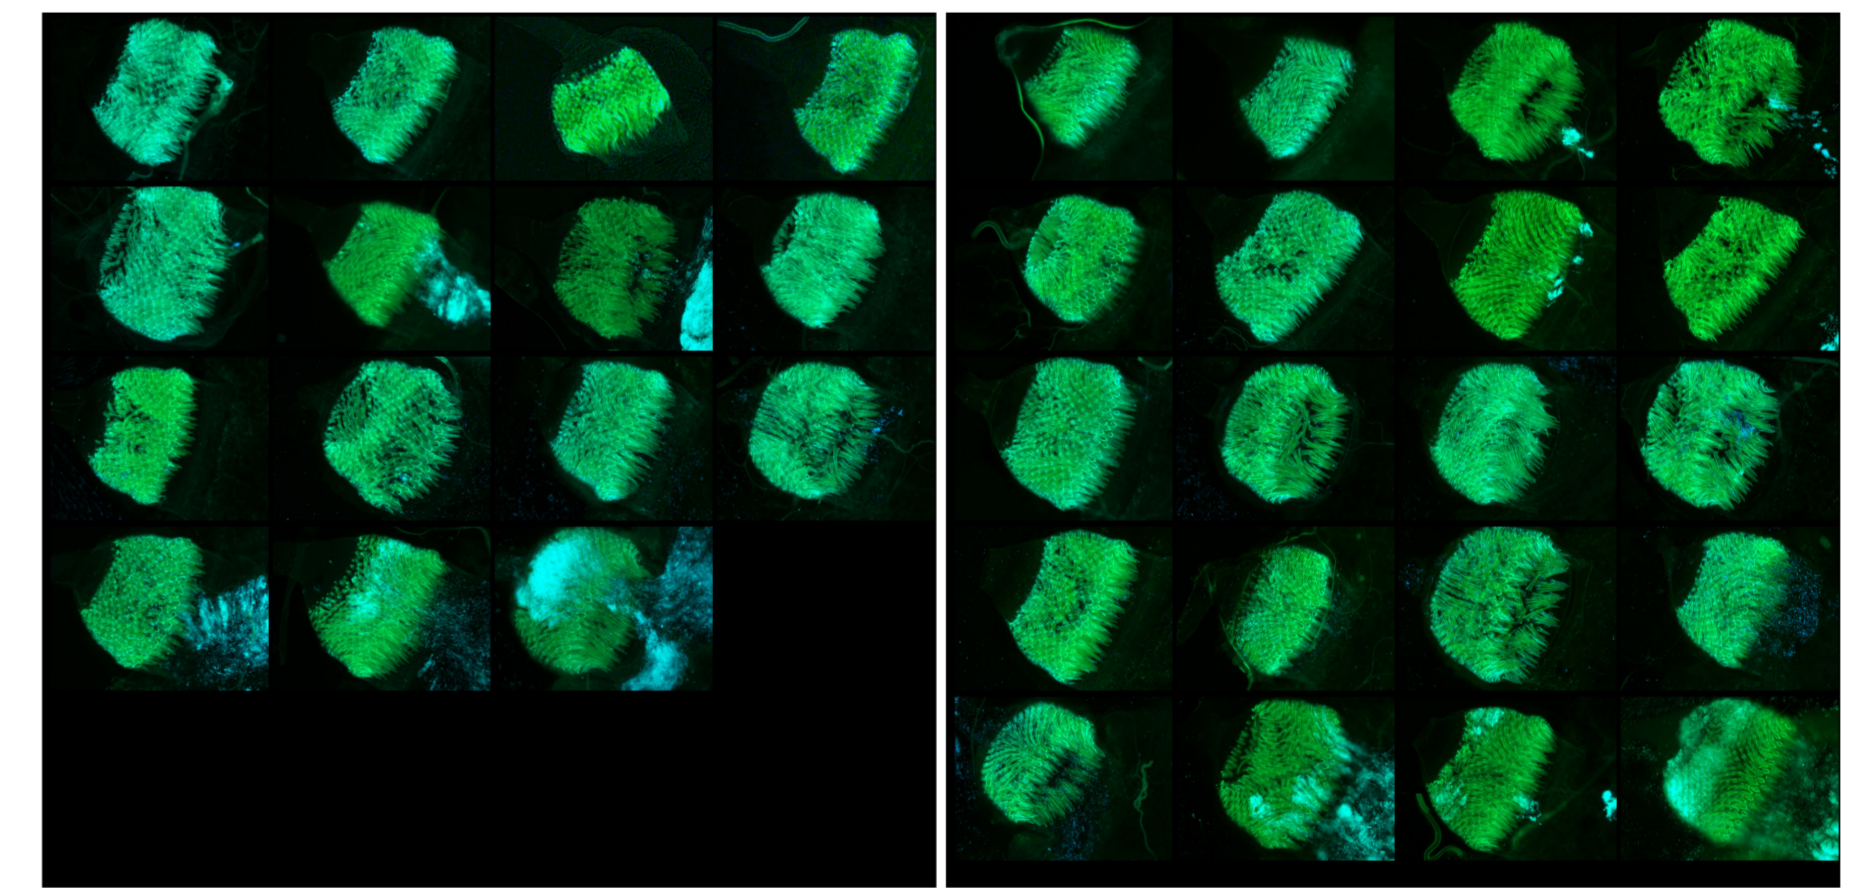

D2

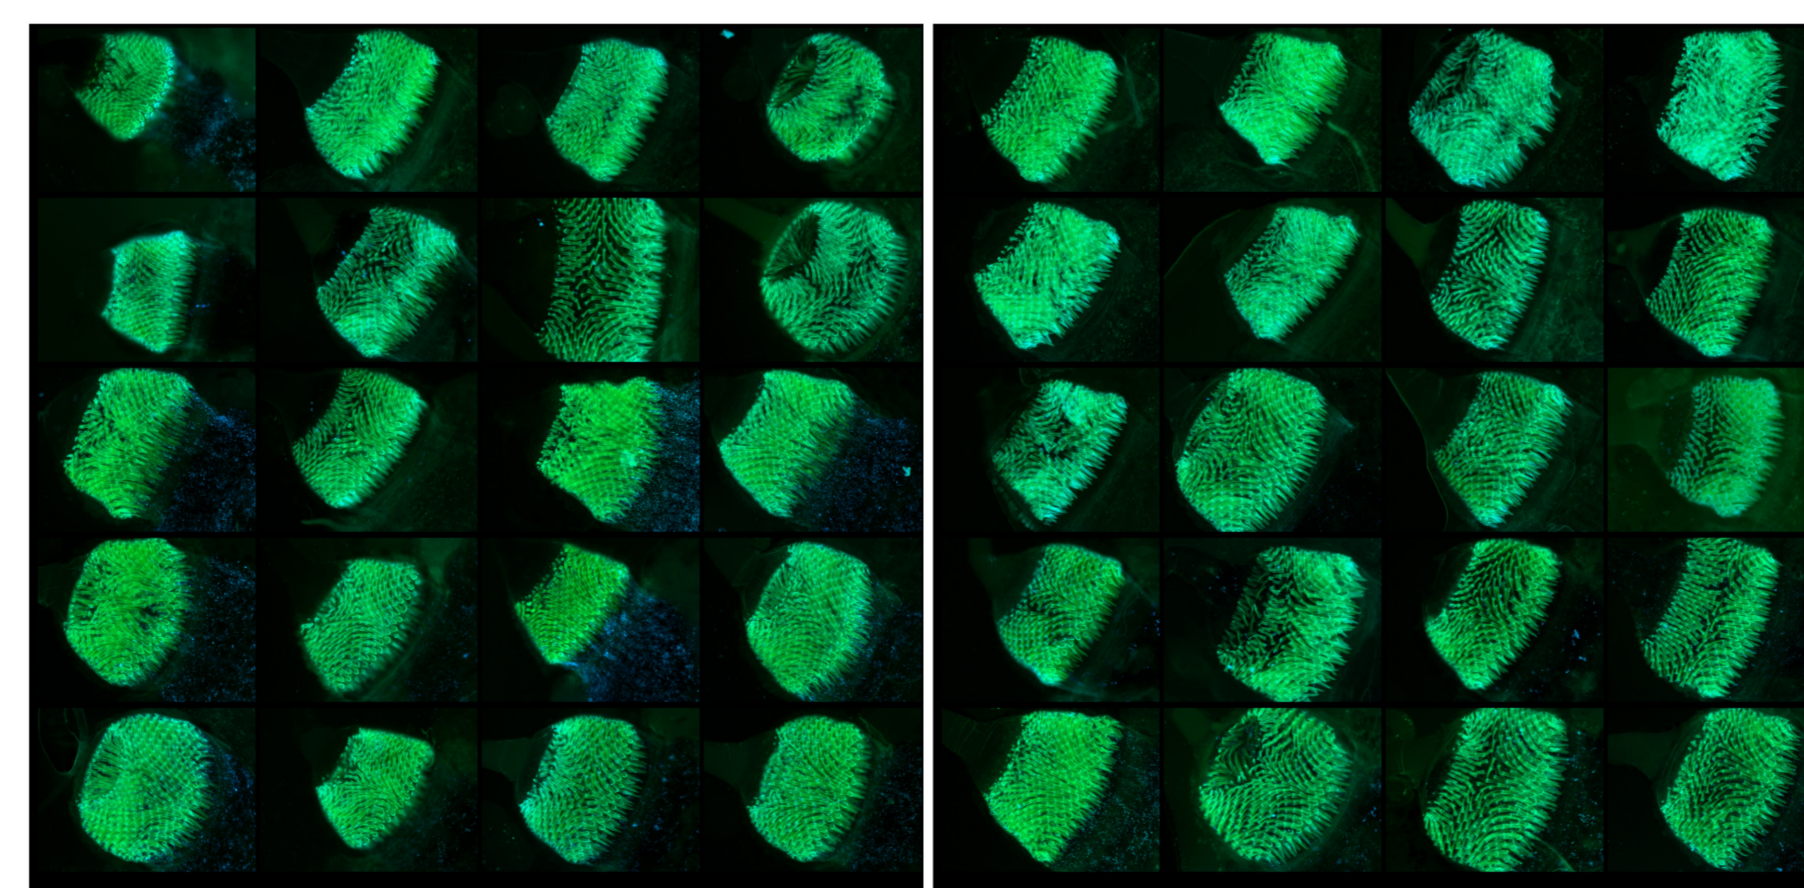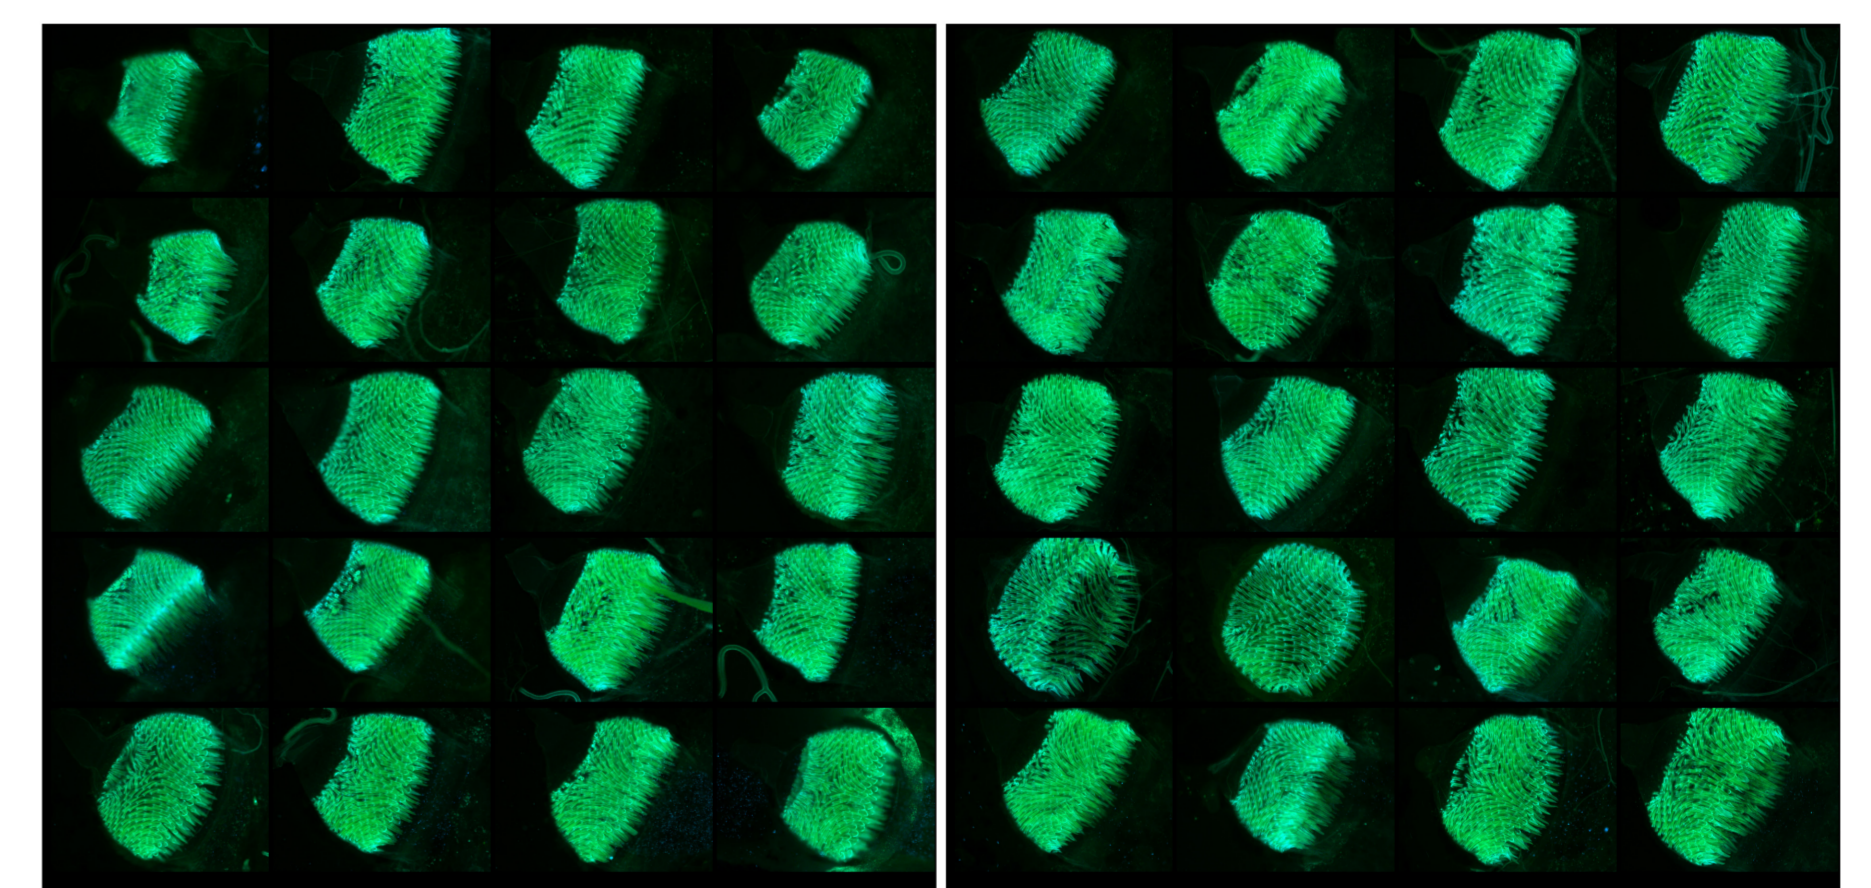

**ΔrpiA ΔrpiA2**

D6

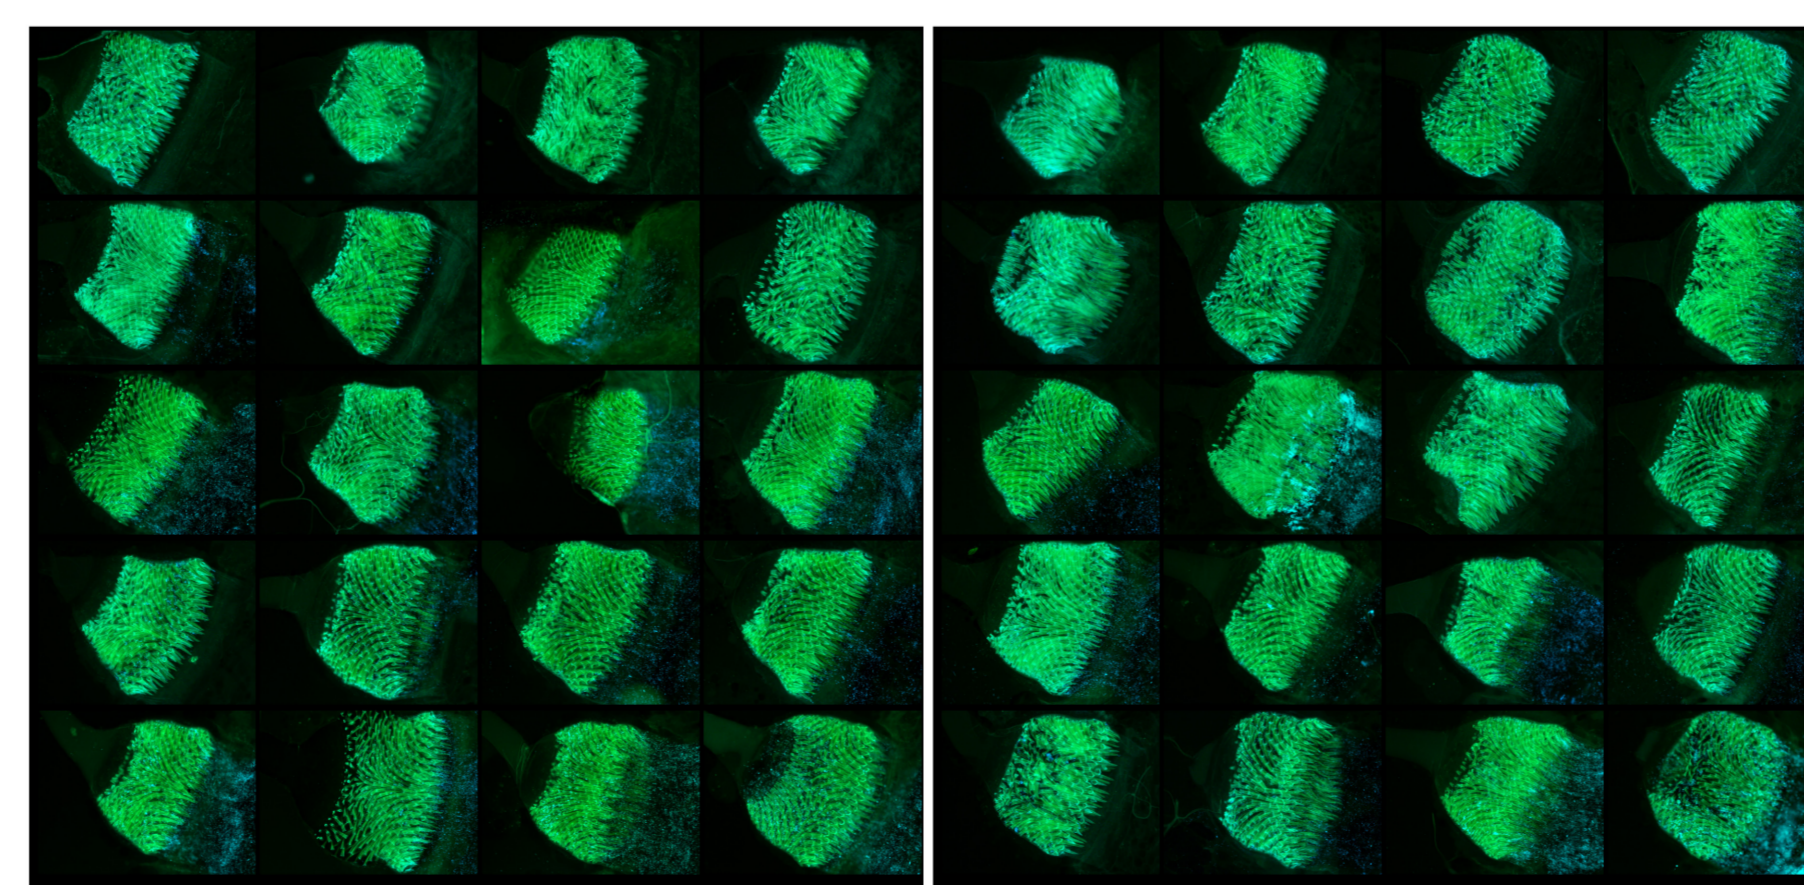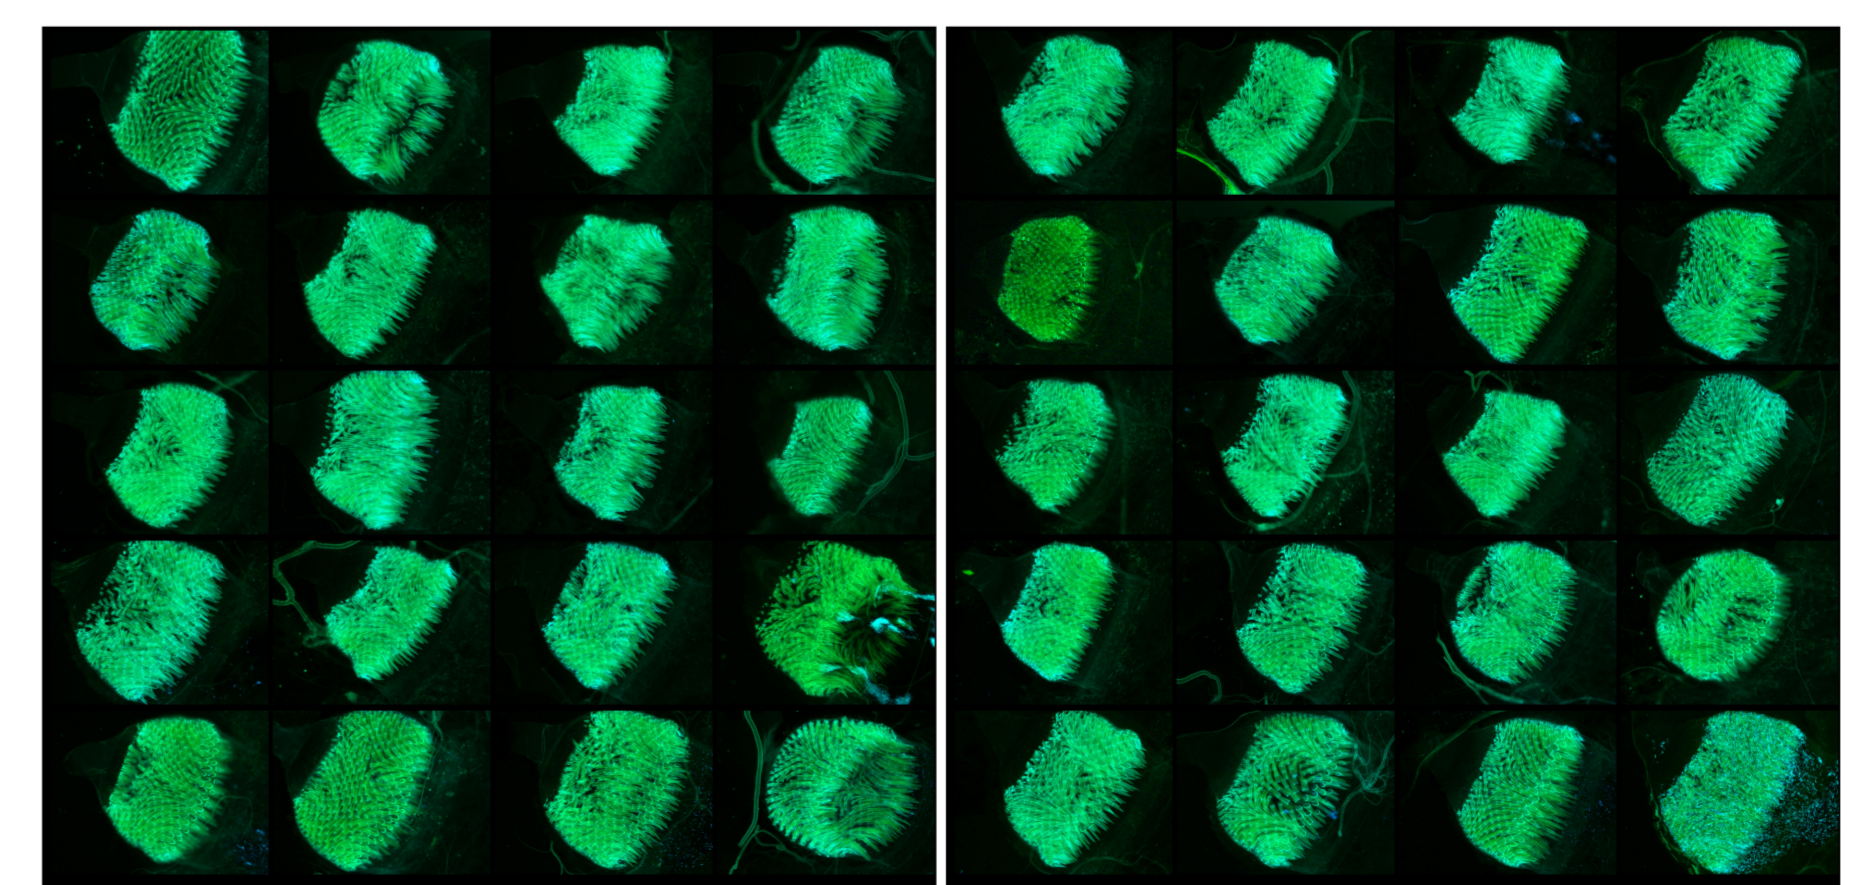

D13

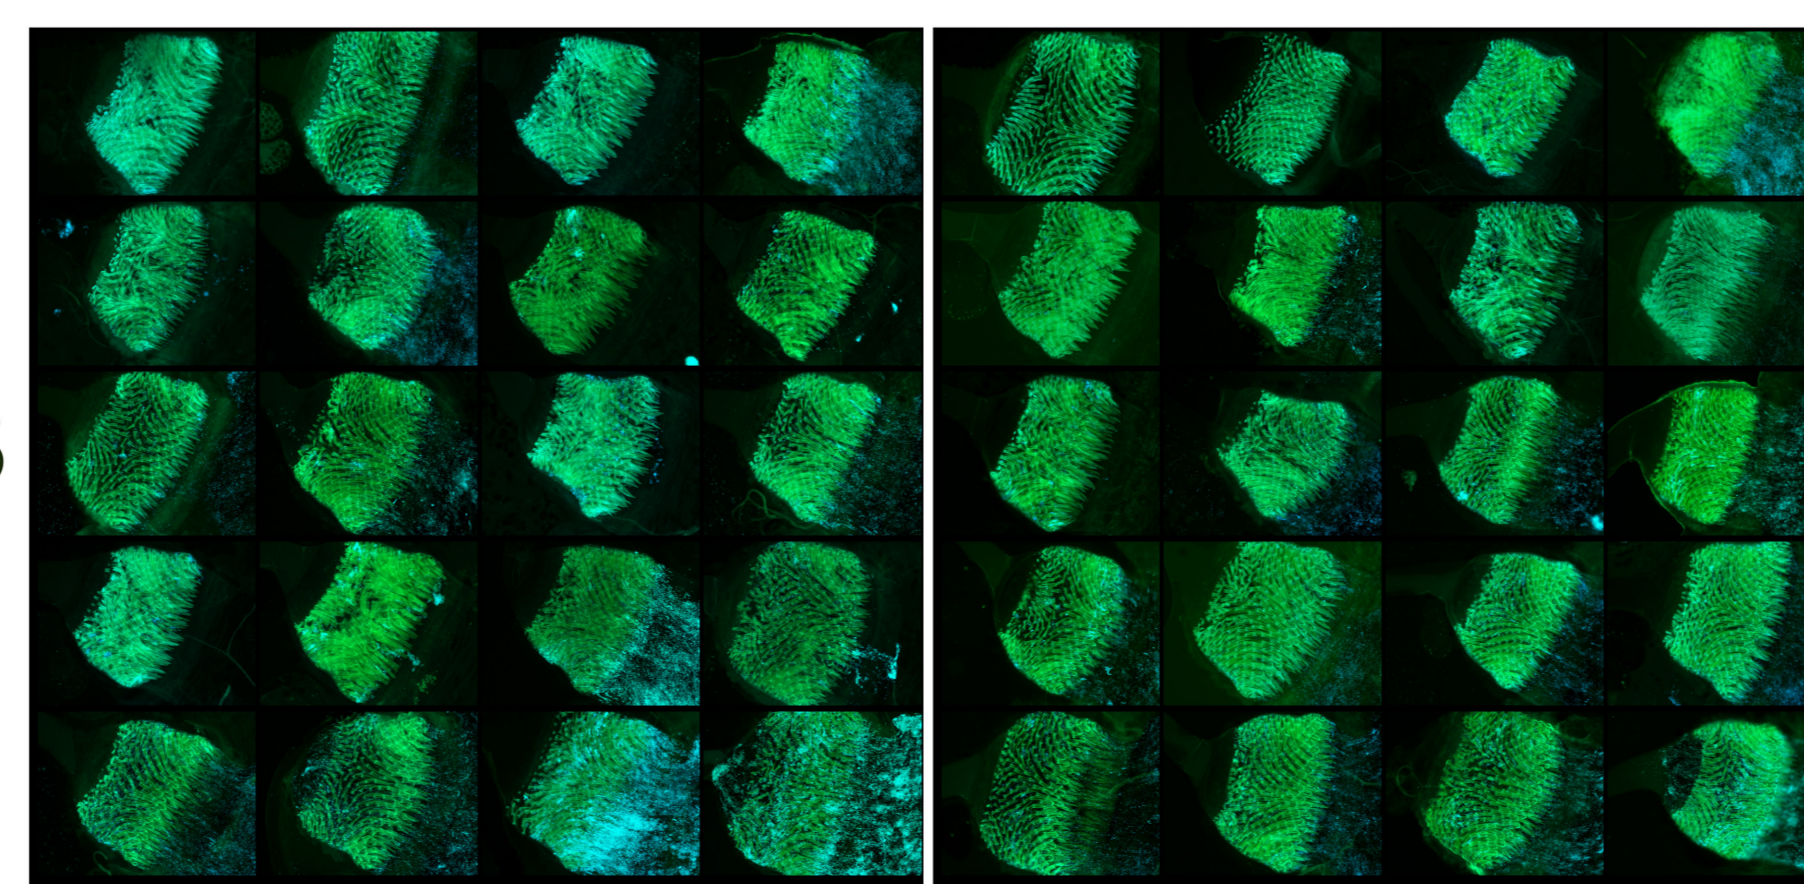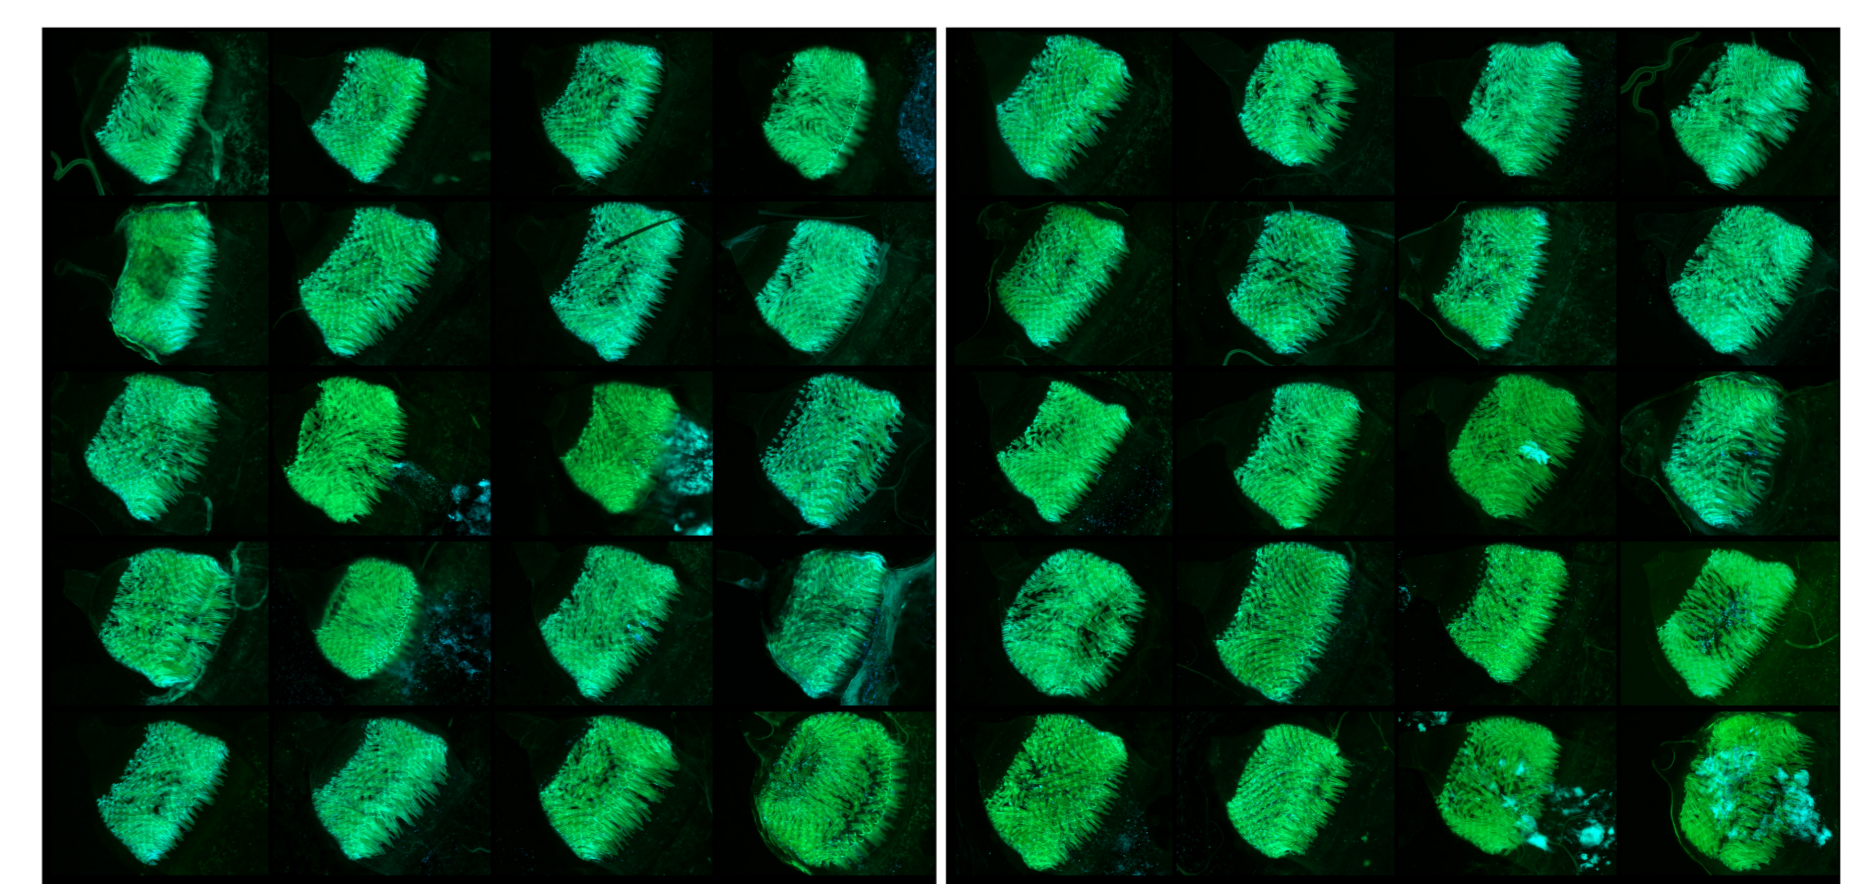

Supplement: ppat.1008440.s007.pdf [file ppat.1008440.s007.pdf]
