# Supplementary material for: A refined model of how Yersinia pestis produces a transmissible infection in its flea vector
Source: PubMed Central journal article supplement (PMC7185726; doi:10.1371/journal.ppat.1008440), 2020-04-15
Supplement: ppat.1008440.s001.pdf [file ppat.1008440.s001.pdf]

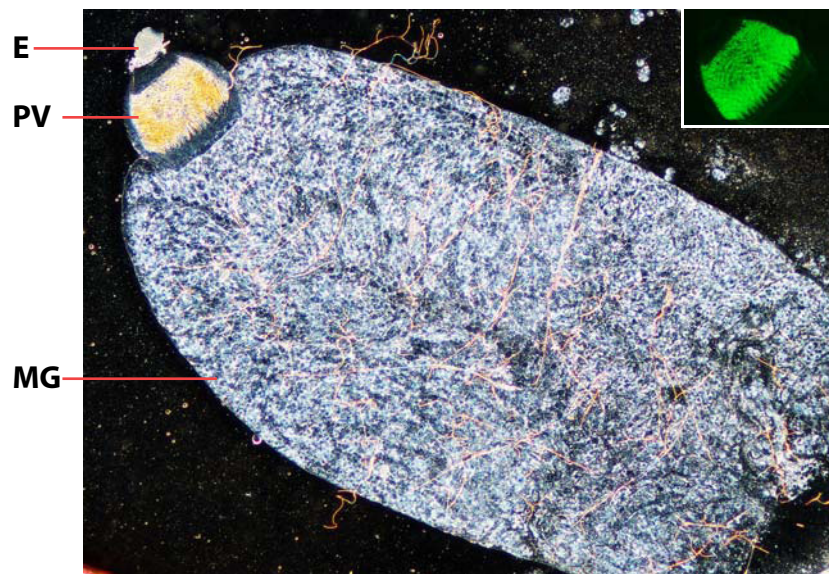

**Figure S1. The flea gut.** The bright-field microscopy image shows part of the insect's digestive tract. The esophagus (E), the proventriculus (PV; brown) and the midgut (MG) are clearly visible. The proventriculus is a valve covered with inward-facing spines, and autofluoresces in green.
