# Supplementary material for: A refined model of how Yersinia pestis produces a transmissible infection in its flea vector
Source: PubMed Central journal article supplement (PMC7185726; doi:10.1371/journal.ppat.1008440), 2020-04-15
Supplement: ppat.1008440.s003.pdf [file ppat.1008440.s003.pdf]

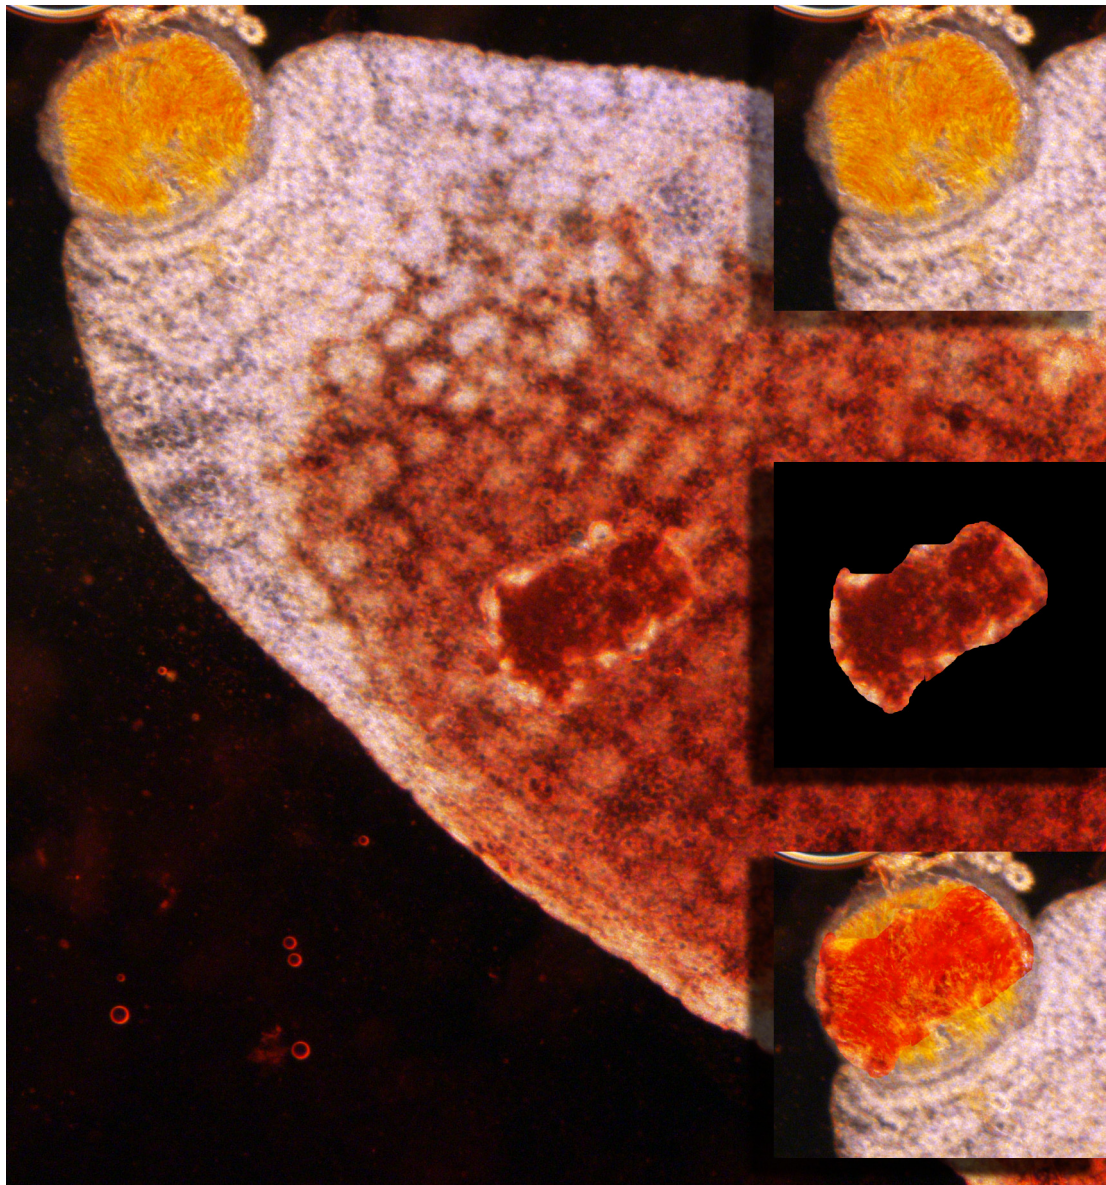

**Figure S3.** Presence of a putative proventricular cast in the midgut of flea collected 6-h post-infection. The image in the bottom inset is a merged image generated using the insets showing the proventriculus and the free-floating mass located into the midgut.
