# Supplementary material for: A refined model of how Yersinia pestis produces a transmissible infection in its flea vector
Source: PubMed Central journal article supplement (PMC7185726; doi:10.1371/journal.ppat.1008440), 2020-04-15
Supplement: ppat.1008440.s004.pdf [file ppat.1008440.s004.pdf]

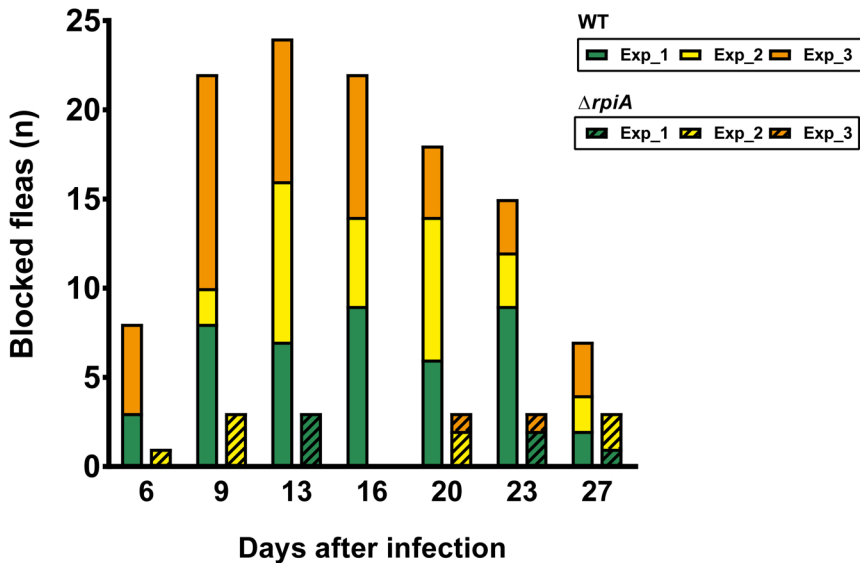

**Figure S4. The  $\Delta rpiA$  mutant blocks fleas stochastically.** The number of fleas (out of a total of 300) displaying blockage at different time intervals after feeding on blood contaminated by the WT (full bars) or the  $\Delta rpiA$  mutant (hatched bars) is shown. Data from three independent experiments are stacked. Each color represents a different experiment.
