# Supplementary material for: A refined model of how Yersinia pestis produces a transmissible infection in its flea vector
Source: PubMed Central journal article supplement (PMC7185726; doi:10.1371/journal.ppat.1008440), 2020-04-15
Supplement: ppat.1008440.s005.pdf [file ppat.1008440.s005.pdf]

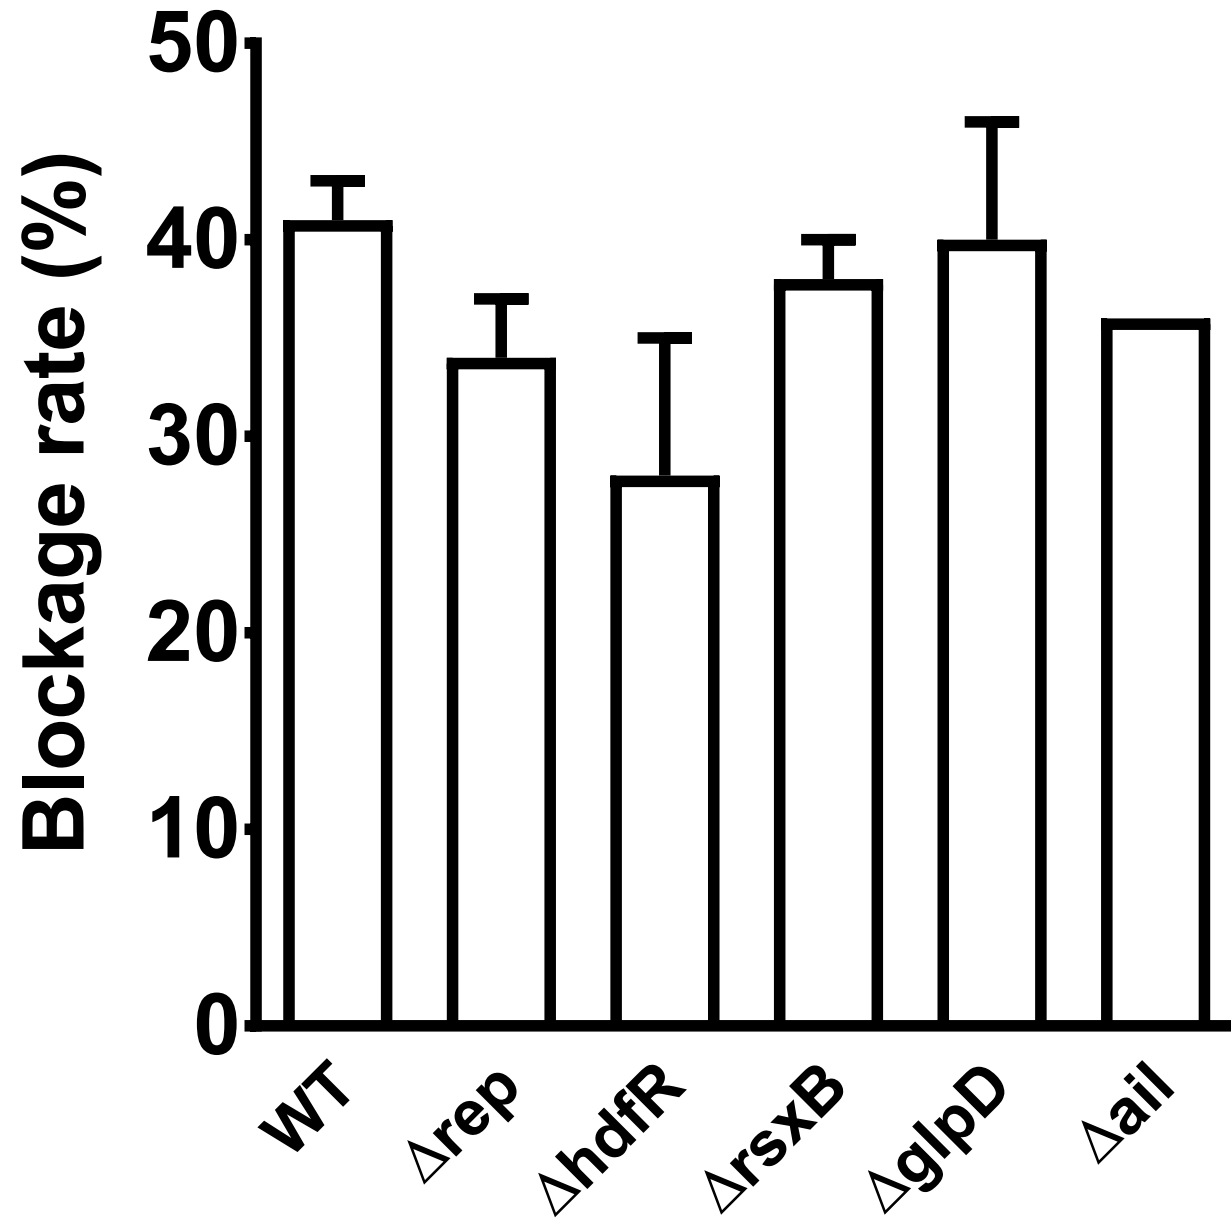

**Figure S5. The  $\Delta rep$ ,  $\Delta hdfR$ ,  $\Delta rsxB$ ,  $\Delta glpD$  and  $\Delta ail$  *Y. pestis* mutants effectively block fleas, even though their ability to produce biofilm in vitro is impaired.** The mean  $\pm$  SEM values of two experiments are shown. However, data from only one experiment using the  $\Delta ail$  mutant are shown because *ail* is known not to be required for flea blockage. The blockage rates in the mutants did not differ significantly from those observed for the WT strain ( $p > 0.1$  in a one-way analysis of variance for all comparisons).
