# Supplementary material for: A refined model of how Yersinia pestis produces a transmissible infection in its flea vector
Source: PubMed Central journal article supplement (PMC7185726; doi:10.1371/journal.ppat.1008440), 2020-04-15
Supplement: ppat.1008440.s006.pdf [file ppat.1008440.s006.pdf]

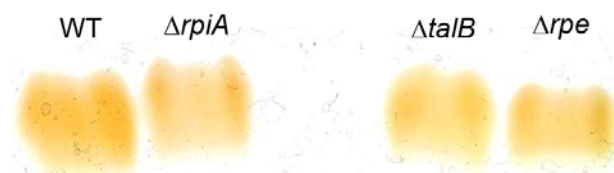

**Figure S6.** The core oligosaccharide of *Y. pestis* lacking *rpiA*, *rpe* or *talB* is not truncated. A silver-stained deoxycholate-PAGE gel is shown.
