# Supplementary material for: A refined model of how Yersinia pestis produces a transmissible infection in its flea vector
Source: PubMed Central journal article supplement (PMC7185726; doi:10.1371/journal.ppat.1008440), 2020-04-15
Supplement: ppat.1008440.s008.pdf [file ppat.1008440.s008.pdf]

**WT** **$\Delta rpiA$** **D6**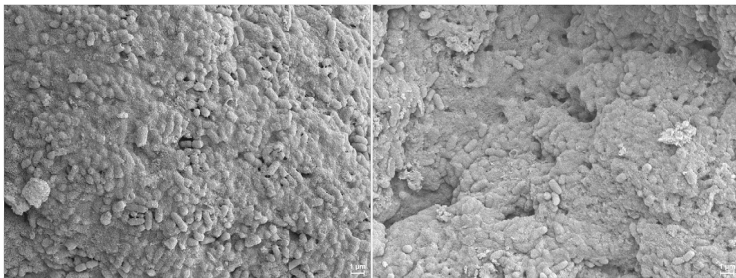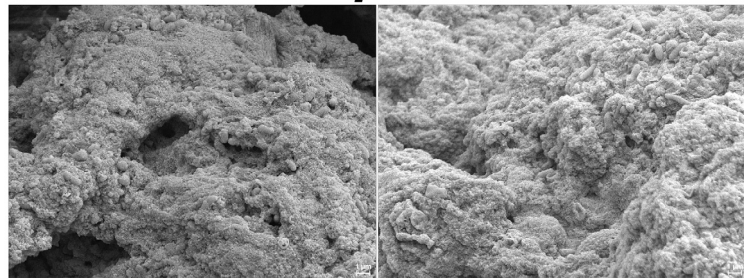**D13**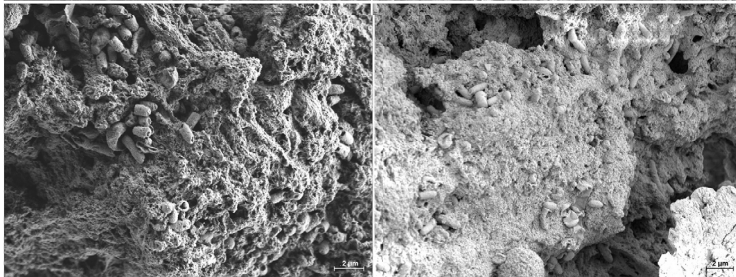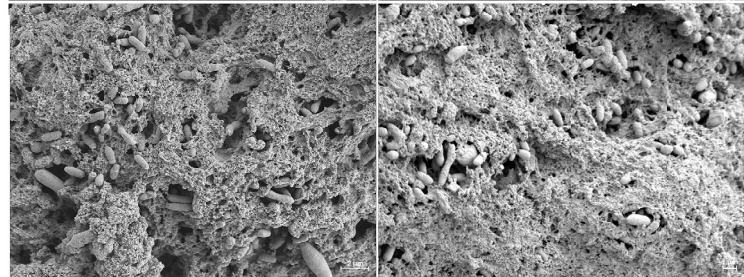

**Figure S8. RpiA activity is needed for the production of a thick mass in the flea gut.** A scanning electron micrograph of the biofilms produced by the WT and the  $\Delta rpiA$  mutant in the flea at days 6 and 13 post-infection. Each photo was taken using the mass collected from a different flea (i.e. two individuals per day/strain).
