# Supplementary material for: A refined model of how Yersinia pestis produces a transmissible infection in its flea vector
Source: PubMed Central journal article supplement (PMC7185726; doi:10.1371/journal.ppat.1008440), 2020-04-15
Supplement: ppat.1008440.s009.pdf [file ppat.1008440.s009.pdf]

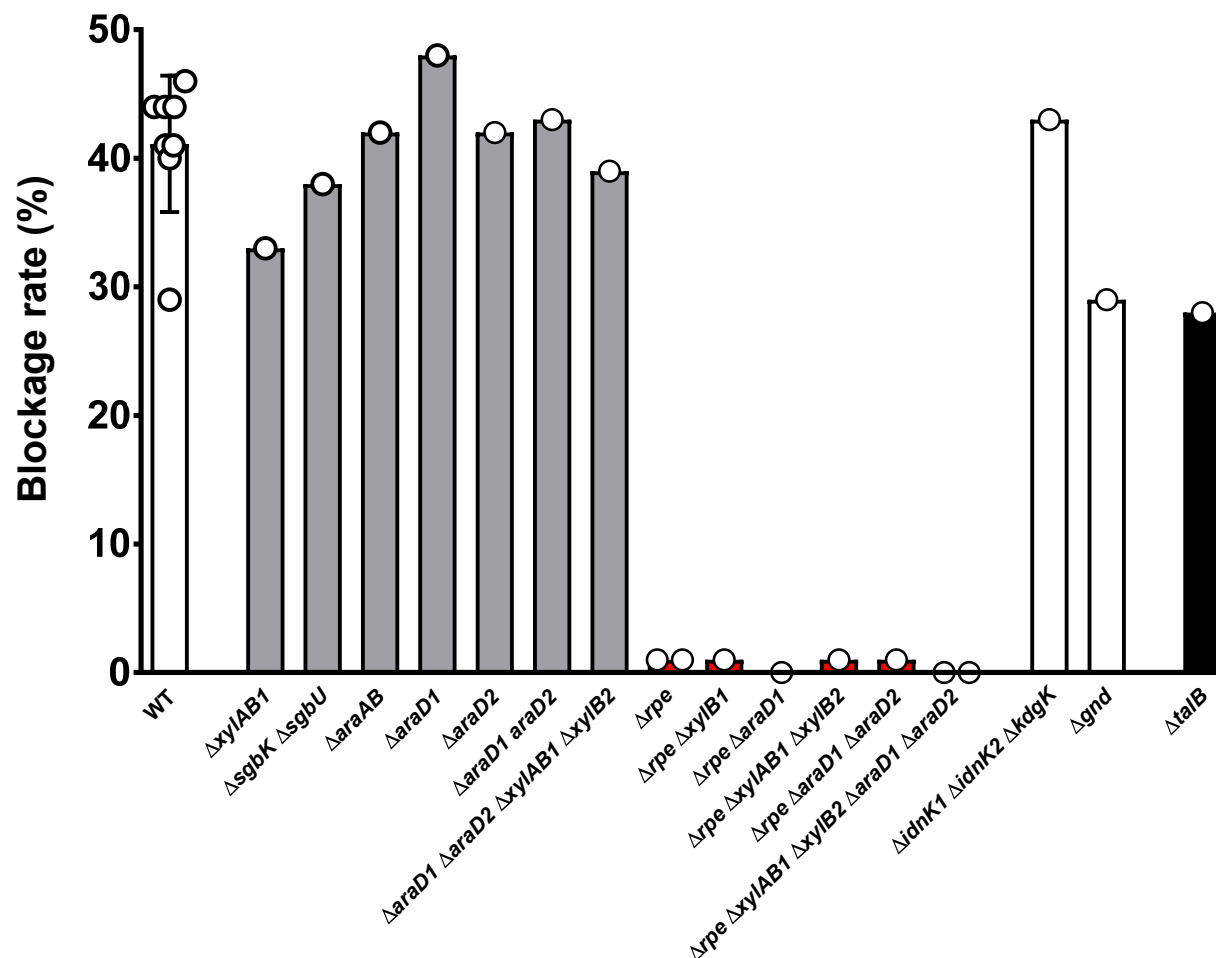

**Figure S9. Role of pentose related metabolic pathways in flea blockage.** The figure has been constructed from 8 independent experiments in which the blocking rate was measured for a strain lacking a gene of interest and for the parental strain. The bars represent the mean  $\pm$  SEM from 8 independent experiments (wild-type control strain), two independent experiments ( $\Delta rpe$  and  $\Delta rpe \Delta xyiAB1 \Delta xyiB2 \Delta araD1 \Delta araD2$ ) and one experiment for all the other mutants. The symbol represent the value obtain in the different experiments. The blockage rate given for the  $\Delta rpe \Delta xyiAB1 \Delta xyiB2 \Delta araD1 \Delta araD2$  mutant was obtained using two independent mutants; one was generated by deleting successively *rpe*, *araD1*, *araD2*, *xyiAB1* then *xyiB2* whereas the other was generated by deleting successively *araD1*, *araD2*, *xyiAB1*, *xyiB2*, *rpe*.
