# Supplementary material for: A refined model of how Yersinia pestis produces a transmissible infection in its flea vector
Source: PubMed Central journal article supplement (PMC7185726; doi:10.1371/journal.ppat.1008440), 2020-04-15
Supplement: ppat.1008440.s010.pdf [file ppat.1008440.s010.pdf]

**Table S1.** Pourcentage of infected fleas.

| Week post-infection | Strain        | Infected fleas (median [range]) | positive fleas/fleas used in total |
|---------------------|---------------|---------------------------------|------------------------------------|
| 1                   | WT            | 95 .0% [85-100%]                | 56/60                              |
|                     | $\Delta rpiA$ | 94.7% [80-95%]                  | 53/59                              |
| 4                   | WT            | 87.2% [84.2-90%]                | 34/39                              |
|                     | $\Delta rpiA$ | 85.0% [80-90%]                  | 34/40                              |

a, cumulative results of 3 (1 week) and 2 (4 weeks) experiments in which 19 to 20 fleas were collected during each experiment.
