# Supplementary material for: A refined model of how Yersinia pestis produces a transmissible infection in its flea vector
Source: PubMed Central journal article supplement (PMC7185726; doi:10.1371/journal.ppat.1008440), 2020-04-15
Supplement: ppat.1008440.s011.pdf [file ppat.1008440.s011.pdf]

**Supplementary Table 2. Plasmids used in the study.**

| Plasmid      | Relevant characteristics <sup>a</sup>                                                | Reference or origin <sup>b</sup> |
|--------------|--------------------------------------------------------------------------------------|----------------------------------|
| pCRII        | cloning vector; Ap and Km                                                            | Invitrogen                       |
| pCR2.1       | cloning vector; Ap and Km                                                            | Invitrogen                       |
| pAcGFP       | vector encoding the green fluorescent protein AcGFP1, Ap                             | Addgene                          |
| pETMCN-EATNH | expression vector, Km                                                                | 1                                |
| pKD4         | ori6K vector, source of Km <sup>R</sup> cassette, Km flanked by FRT sites            | 2                                |
| pEP1013      | vector encoding the Red recombinase, Ap                                              | 3                                |
| pEP1436      | vector derived from pEP1013 and encoding the endonuclease I-SceI, Ap                 | This work                        |
| pEP1042      | derived from pKD4, source of Zeo <sup>R</sup> cassette flanked by FRT sites          | 3                                |
| pEP1087      | derived from pKD4, source of Tp <sup>R</sup> cassette flanked by FRT sites           | 3                                |
| pEP1237      | derived from pKD4, source of Er <sup>R</sup> cassette flanked by FRT sites           | This work                        |
| pEP1326      | derived from pKD4, source of Sm <sup>R</sup> cassette by FRT sites                   | This work                        |
| pEP864       | derived from pKD4, source of Er <sup>R</sup> cassette (no FRT)                       | This work                        |
| pEP865       | derived from pKD4, source of Sm <sup>R</sup> cassette (no FRT)                       | This work                        |
| pEP866       | derived from pKD4, source of Zeo <sup>R</sup> cassette (no FRT)                      | This work                        |
| pEP1446      | derived from pKD4, source of Km <sup>R</sup> cassette with I-SceI site (no FRT)      | This work                        |
| pEP1454      | derived from pKD4, source of Tp <sup>R</sup> cassette (no FRT)                       | This work                        |
| pAil         | pBluescript KS(-) expressing <i>ail</i>                                              | 4                                |
| pCH16        | pACYC177 constitutively expressing <i>ymt</i>                                        | 5                                |
| pAD1         | pCRII topo containing <i>rpiA</i> (y3302) under the control of its putative promoter | This work                        |
| pAD2         | pCR2.1 containing <i>rpiA2</i> (y2892) under plac promoter                           | This work                        |
| pAD3         | pCRII topo containing <i>rpiA</i> (y3302) open reading frame                         | This work                        |
| pAD4         | pCRII topo containing <i>rpiA2</i> (y2892) open reading frame                        | This work                        |
| pAD5         | pETMCN-EATNHΩ, NdeI / XbaI insert from pAD3                                          | This work                        |
| pAD6         | pETMCN-EATNHΩ, NdeI / XbaI insert from pAD4                                          | This work                        |
| pAD7         | pCRII containing <i>rep</i> under the control of its putative promoter               | This work                        |
| pAD8         | pCRII containing <i>hdfR</i> under the control of its putative promoter              | This work                        |
| pAD9         | pCRII containing <i>glpD</i> under the control of its putative promoter              | This work                        |

a, Ap<sup>R</sup>, Km<sup>R</sup>, Tp<sup>R</sup>, Zeo<sup>R</sup>, Er<sup>R</sup>, Sm<sup>R</sup> resistance to ampicillin, kanamycin, trimethoprim, zeocin, erythromycin and streptomycin respectively

b, references are provided in supplementary text
