# Supplementary material for: A refined model of how Yersinia pestis produces a transmissible infection in its flea vector
Source: PubMed Central journal article supplement (PMC7185726; doi:10.1371/journal.ppat.1008440), 2020-04-15
Supplement: ppat.1008440.s012.pdf [file ppat.1008440.s012.pdf]

|                     |                                                     |                          |                       |   |
|---------------------|-----------------------------------------------------|--------------------------|-----------------------|---|
| y3755               | TTACATTACAGCTTGGGTCTCTAAGGTTTGGCTCGGTTCCACCAATAGGCA | CATATGAATATCCTCCTTAG     | ATCACTATCGAGCCGATGAG  | - |
| y3776               | GTGATATATGATATTTGGTATGATATCATTTATCATTTGGGTGGGCATCA  | GTGTAGGCTGGAGCTGCCTTC    | GATCGTAGGATGGCTATTC   | - |
| y3777-y3782         | TTATCCCGATGATCGGATACCCCATCATGACACCCACCGTGCATTAG     | CATATGAATATCCTCCTTAG     | AAGTCTCTAGAATTCGCCCC  | - |
| y3891               | TTGACATTTTATCTCATGCGGAGGGATAGTCTGCTTTTATCTGCTGT     | GTGTAGGCTGGAGCTGCCTTC    | TTCACTCCGTGTCCGATGAGT | - |
| y3927- y3931        | TCACAGTTCGAGCTCGTGTTCAGCAGCATTTCTACTTGTGGGCCGTCC    | CATATGAATATCCTCCTTAG     | ATGGCACCCGCGGATTA     | - |
| y3950               | ATGATGAAGAGCTGATAAATACTTAAATAACGCGCCAACTCTGAT       | GTGTAGGCTGGAGCTGCCTTC    | ATTGCCGGAAAGTTGAGATG  | - |
| y4034-y4038         | TTGCGATTCCTGAGCGTTTAAACCCAGGCAAAAGCCATAAAATCGGCA    | CATATGAATATCCTCCTTAG     | ATCGCAGAGGAAGTACATCG  | - |
| y4043-y4046         | TTGGCTATTTTGTGGTTTTGATTACAACTCGTAGCGAAAGCAACATT     | GTGTAGGCTGGAGCTGCCTTC    | CCCTCTAGATTCAAGGTTTC  | - |
| y4045-y4047         | TTAAGAAACAGCGGCGAGCGCTGTGTTTTTCACTGTGGCCATCAGCCA    | CATATGAATATCCTCCTTAG     | TTCTCTCTCAGACCGGAAGA  | - |
| y4050               | ATGCTGATCCAAAGTATTTGGCTTGGCTCTCTATCTGGTGGTGTGCTAA   | GTGTAGGCTGGAGCTGCCTTC    | GAGTGTTCGGGAAACAC     | - |
| y4063               | GTGACGTGCCCCCGCTGCGGATACGCGTAATGAGGCATTACTGGATGA    | CATATGAATATCCTCCTTAG     | TCAGGTTAGCCAGTCTCT    | - |
| y4067               | ATGAGACCGTAAACCGCGATATCTGCGCTTGTACTTTTTCTATGCTTA    | CATATGAATATCCTCCTTAG     | CGTAGCCATTTTTCGAGA    | - |
| y4100-y4101         | TTAGCGATAAATAACCGCGATATCTGCGCTTGTACTTTTTCTATGCTTA   | CATATGAATATCCTCCTTAG     | GACCTCTCCAGTGAACCA    | - |
| y4057-4058 (xylAB2) | ATGCATATCAGCTTATTTGGTAATCTGCTGCTGGGTTATCGGGTTCGT    | GTGTAGGCTGGAGCTGCCTTC    | CCAGCCGCAATTTTGTAGT   | - |
| y2893 (xylB1)       | TTACATTCGCGGTGAAGATGGCGATCAGGGGCTGGCACCACTTATTTT    | CATATGAATATCCTCCTTAG     | CTGCTTGGCTGAGCTAAACT  | - |
| y0856-55 (sgbU-1yK) | ATGCGATTACGTTTAGCTTTATTTTCGTCTACTGCGGCCAACCTTTGC    | GTGTAGGCTGGAGCTGCCTTC    | TAATCTGCTCTGGCGCTGC   | - |
| y2095-94 (araAB)    | TTAGCGATAAATAACCGCGATATCTGCGCTTGTACTTTTTCTATGCTTA   | CATATGAATATCCTCCTTAG     | CCGAATATGGGGCTGACAG   | - |
| y2072 (araD2)       | ATGCATATCAGCTTATTTGGTAATCTGCTGCTGGGTTATCGGGTTCGT    | GTGTAGGCTGGAGCTGCCTTC    | GCATGGAGCAACATAGAA    | - |
| y0863 (araD1)       | TTGCCAGCAAGCGGTTATTTGCTACTGAGCATCATCGCTCTCGGTGCG    | ATCATATGAATATCCTCCTTAG   | TATGGGATGGCGGATAATC   | - |
| y1646 (idnK2)       | TTGGCTATTTCCACCCTACTGATGCTCAACCGGCTCTTTCGCTCGTCT    | GTGTAGGCTGGAGCTGCCTTC    | CCGAGAAGAAACAGAGA     | - |
| y3876 (gntV/indk)   | TTAACTGGCGCGCTTCCGGCGGATCAGTACTGATTTTCTTGGCTTGT     | GTGTAGGCTGGAGCTGCCTTC    | GGATCACTGCTATGCTTCC   | - |
| y3838 (kdgK)        | TTGACTCATTTAATAAATCTATTATGTGATGGTATTTTCAGAGATAT     | GTGTAGGCTGGAGCTGCCTTC    | GCCTGAATCTGCCATCAA    | - |
| y2629 (gnd)         | TTAATTTATAAATCAGAGCATAGGTTGCTGAGAGACAAAGTACCGGT     | GTGTAGGCTGGAGCTGCCTTC    | GAGGGTGTAACTCAACT     | - |
| y3938 (rpe)         | TTACATTCGCGGTGAAGATGGCGATCAGGGGCTGGCACCACTTATTTT    | CATATGAATATCCTCCTTAG     | CTTGTAGCATCAACAGCCC   | - |
| y3712 (talB)        | ATGACCGATAAATTAATTAAGCAATTAAGCAATTAAGCAATTAAGCA     | ATATGAATATCCTCCTTAG      | CTTGTAGCATCAACAGCCC   | - |
| y3310 (tktA)        | TTAAGCAAGTCCGAGATCAATTTTCTCAAGTTTGGCTTGGTGTAGCAA    | CATATGAATATCCTCCTTAG     | GATGCCGTCTGCCAGTTAT   | - |
| y0357-rhlB          | ATGCTCCTCGTAAAGAGCTTGGCAAGCTATCCGCGCACTAAGCATGGA    | GTGTAGGCTGGAGCTGCCTTC    | GGTTTTGCTATCGCAGAAC   | - |
| y0329-y0331         | TTACTTCAGCAGCGCTGAGCTTTGCCCAACCGTTTTTCCACGGTAAAC    | CATATGAATATCCTCCTTAG     | GAAACACGCTACGGATTTTC  | - |
| y1324 (ail)         | ATGACCAAACACACTTGAATGAAAGGTTTTCCGAGTTCGCGCTGCA      | GTGTAGGCTGGAGCTGCCTTC    | TATCGCTCATGTTTACTCTC  | - |
| y1325 (heaT)        | CTAAGCTCTTCCAATAGCAGTGGCCATTTGAACATTAATTTGCCAGT     | GACTCATATGAATATCCTCCTTAG | TAGTGAAGATAAACGGGC    | - |
| y1326-28            | ATGGAATATTTAGAAAGTCCGTGCTTATCTGTGATTTCTCGTGTGT      | GTGTAGGCTGGAGCTGCCTTC    | TGCTCAAGAAAGCGTACC    | - |
| y1329-30            | TTACCGGGAGTAAAGTGGCGATGACTGAGGGCGGTGATCTGGGTTGAG    | ATATGAATATCCTCCTTAG      | ATTGAAAGCGTAGCCATGGC  | - |
| y0356 (rep)         | ATGGTTTTTATGAATAAGCAATTAAGTGTCTCTCTTAAATTCATGTTT    | GTGTAGGCTGGAGCTGCCTTC    | TTTGTCAAGCAATGGTCGC   | - |
| y0332 (hdfR)        | TTAGAACCGGTAAACCGCGCAAGCATCCAAGTACCCACTTTTCAATCA    | CATATGAATATCCTCCTTAG     | CGCGGTGAAAGCGGATTTCT  | - |
| y3891 (glpD)        | ATGGTATTTCAATCAACAGCTTGGCTATCGCTCAGTATTTTCACTATT    | GTGTAGGCTGGAGCTGCCTTC    | TGCTCAAGAAAGCGTACC    | - |
| y3302 (rpiA)        | CTGGCTAATTTGTTGGTTCCGGCCACTCGTGGCGGATAAACAGCGCC     | CATATGAATATCCTCCTTAG     | GCATGGCTACGCTTTCAAT   | - |
| y2892 (rpiA2)       | ATGCGCTAAAACCGCCCTTAAAGCTCGGTTATCTGATCAACCGCTGT     | GTGTAGGCTGGAGCTGCCTTC    | CGCATATTATCAACCTTGG   | - |
| ymt                 | GGCAGTTCAAATGCGGCAATAAAGCTTTTATTAACAAGTCAAGCGG      | CATATGAATATCCTCCTTAG     | GTAITGGGTTGATGACAGTG  | - |
|                     | TCAGCGCAAAATGGAGCAACAGCCCAACCATCTCCGCGTGAAGGACA     | CATATGAATATCCTCCTTAG     | CTTAAAGSGCTGTTTAGGC   | - |
|                     | GTGGCTTTCTGTTACAATTCGCTTCCCGTAAACCCATTTAGGCAACCG    | AGCATATGAATATCCTCCTTAG   | TGCAAGGCTCGGTGATTA    | - |
|                     | CTACGGTTTTCTCGATTTCGTAATGAGCAGCAAGATTTGCCAGATGAC    | GTGTAGGCTGGAGCTGCCTTC    | GGATGTCATAACCGCTGTA   | - |
|                     | GTGGATACCGAATTAATGAAACCTTTTAGAGGTCAGTGAACCTCGTCA    | GTGTAGGCTGGAGCTGCCTTC    | GGATATTGGCGGATGAAA    | - |
|                     | TTACTCCCGTTAAACGCTCTGGGTGCGGTTATTCATGGGGTTTTTAAGA   | CATATGAATATCCTCCTTAG     | GATGCCGTCTGCCAGTTAT   | - |
|                     | TTGGCTATTTGTTGGTTTTGATTACAATCGTAGCGAAACGAACATT      | GTGTAGGCTGGAGCTGCCTTC    | GGTTTTGCTATCGCAGAAC   | - |
|                     | TTAAGAAACAGCGGCGAGCGCTGTGTTTTTCACTGTGGCTATCAGCCA    | CATATGAATATCCTCCTTAG     | GAAACACGCTACGGATTTTC  | - |
|                     | ATGACTCAGGATGAATTAATAAGCGGTGGGCTGGCGCATTTAGTTA      | GTGTAGGCTGGAGCTGCCTTC    | TATCGCTCATGTTTACTCTC  | - |
|                     | TTAGCCAACTCACTTAAACGCCATTTGGCCGTACAATCAGGSCACAT     | CAGCATATGAATATCCTCCTTAG  | TAGTGAAGATAAACGGGC    | - |
|                     | ATGAGCAATCAACAAAATGACCCAAAGAGGGCTGCGCCCGTGGGTGAT    | GTGTAGGCTGGAGCTGCCTTC    | TGCTCAAGAAAGCGTACC    | - |
|                     | TTATCGCAGTTGAAGTAGGAGAACCGTCAAAAATAGCCCAACCATAC     | CATATGAATATCCTCCTTAG     | ATTGAAAGCGTAGCCATGGC  | - |
|                     | ATGCTTCAAATAGATAAATGTCATTAATAAATTTGAAACTACTTTTCA    | TGTGTAGGCTGGAGCTGCCTTC   | TTTGTCAAGCAATGGTCGC   | - |
|                     | TCAATTTGGCTTAAATTTGGAAATGCATTTGGGCTAGAAATTTCCA      | CATATGAATATCCTCCTTAG     | CGCGGTGAAAGCGGATTTCT  | - |
|                     |                                                     |                          | GCTCAAGAAAGCGTACC     | - |
|                     |                                                     |                          | ATTGAAAGCGTAGCCATGGC  | - |
|                     |                                                     |                          | TTTGTCAAGCAATGGTCGC   | - |
|                     |                                                     |                          | CGCGGTGAAAGCGGATTTCT  | - |
|                     |                                                     |                          | TGCTCAAGAAAGCGTACC    | - |
|                     |                                                     |                          | GCATGGCTACGCTTTCAAT   | - |
|                     |                                                     |                          | CGCATATTATCAACCTTGG   | - |
|                     |                                                     |                          | GTAITGGGTTGATGACAGTG  | - |
|                     |                                                     |                          | CTTAAAGSGCTGTTTAGGC   | - |
|                     |                                                     |                          | GCTATGTTTCTGTGAGTCTG  | - |
|                     |                                                     |                          | AAACGTCACGTTGATGGCT   | - |
|                     |                                                     |                          | TTGCCATAGTAACAGTCAAC  | - |
|                     |                                                     |                          | GCTCATTGAAAGCGTAGCCA  | - |
|                     |                                                     |                          | TTTCCAGGTTACACTCAGCT  | - |
|                     |                                                     |                          | CCCTCTAGATTCAAGGTTTC  | - |
|                     |                                                     |                          | TTTCTTTCAGACCGGACGA   | - |
|                     |                                                     |                          | GGCAATGCTGAGTATTAC    | - |
|                     |                                                     |                          | TGCAATGAATCCGTCAGCA   | - |
|                     |                                                     |                          | TTTCTTGTGCGCAACTGG    | - |
|                     |                                                     |                          | CCGCAATGGCAATCCAGAA   | - |
|                     |                                                     |                          | ACCAACCAATGGCGACTTC   | - |
|                     |                                                     |                          | GAGGGCGCTGGTAATTGAA   | - |
|                     |                                                     |                          | GGCCAGAATGTCATTTGCCT  | - |
|                     |                                                     |                          | TTCACTACTGTAACGCTGC   | - |
|                     |                                                     |                          | CATGGCGCTGATTAATTGC   | - |
|                     |                                                     |                          | TTTCCAGGTTACACTCAGCT  | - |
|                     |                                                     |                          | CAAAGCTTAGATTCAAGGTTT | - |
|                     |                                                     |                          | CGTTCGTAACCGCTAT      | - |
|                     |                                                     |                          | GGCAATGCTGAGTATTAC    | - |
|                     |                                                     |                          | GGGCGACAGGTTAATCAA    | - |
|                     |                                                     |                          | GAAACCTTCCAGAACTTGG   | - |
|                     |                                                     |                          | CTGCATGCTGTGATGCTCTC  | - |
